1 Long-term experimental evolution reveals purifying selection on piRNA-  
2 mediated control of transposable element expression

3

4 Ulfar Bergthorsson<sup>\*1</sup>, Sheeba Singh<sup>\*2,3</sup>, Anke Konrad<sup>1</sup>, Tony Belicard<sup>2,3</sup>, Toni  
5 Beltran<sup>2,3</sup>, Vaishali Katju<sup>^1</sup>, Peter Sarkies<sup>^2,3</sup>

6

7

8

9

^Joint corresponding

10 \*co-first authors

11 <sup>1</sup> Department of Veterinary Integrative Biosciences, Texas A&M University, College  
12 Station, TX 77845, USA

13 <sup>2</sup> MRC London Institute of Medical Sciences, Du Cane Road, London W12 0NN UK

14 <sup>3</sup> Institute of Clinical Sciences, Imperial College London, Du Cane Road, London  
15 W12 0NN UK

16 ^Vaishali Katju [vkcatju@cvm.tamu.edu](mailto:vkcatju@cvm.tamu.edu)

17 ^ Peter Sarkies [psarkies@imperial.ac.uk](mailto:psarkies@imperial.ac.uk)

18

19 **Abstract**

20 **Transposable elements (TEs) are a key component of eukaryotic genomes.**  
21 **TEs can copy themselves independently of the host genome, thus are often**  
22 **considered to be selfish genomic elements. However, TE dynamics within**  
23 **genomes have contributed to adaptive evolution leading to speculation**  
24 **that natural selection preserves TE expression. Here we used**  
25 **experimental evolution of *C. elegans* to study the dynamics of TE**  
26 **expression over 400 generations in population sizes maintained at 1, 10**  
27 **and 100 individuals. We demonstrate increased TE expression relative to**  
28 **the ancestral population, with the largest increases corresponding to**  
29 **smaller population sizes. Using high-throughput small RNA sequencing we**  
30 **show that the transcriptional activation of TEs within active regions of the**  
31 **genome is associated with loss of piRNA-mediated silencing, whilst**  
32 **desilenced TEs in repressed chromatin domains retain small RNAs.**  
33 **Additionally, we find that the sequence context of the surrounding region**  
34 **influences the propensity of TEs to lose silencing through failure of small**  
35 **RNA-mediated silencing. Together, our results show that natural selection**  
36 **in *C. elegans* is responsible for maintaining low levels of TE expression, and**  
37 **provide new insights into the epigenomic features responsible. [183**  
38 **words]**

39

40 **Introduction**

41

42 Transposable elements (TEs) are almost ubiquitous across eukaryotic  
43 genomes(Pritham, 2009). Their ability to replicate independently of the host  
44 genome, coupled with the existence of multiple copies liable to ectopic  
45 recombination means they present a potential threat to genome stability.

46 Moreover, TEs pose a threat to genome function as new integrations can disrupt

47 genes or gene regulatory elements. As a result, organisms have evolved  
48 sophisticated control strategies, which protect the genome from TE proliferation.

49

50 Across eukaryotes short (20-33 nucleotides) small RNAs are key to TE control.  
51 Within animals, Piwi-interacting small RNAs (piRNAs) are paramount in the TE  
52 defence armoury(Siomi et al., 2011). piRNAs are produced from defined  
53 genomic loci named piRNA clusters and after processing, associate with the Piwi  
54 subfamily of argonaute proteins(Brennecke et al., 2007). They recognise TEs  
55 through sense-antisense base pairing and target TEs for transcriptional and  
56 post-transcriptional silencing(Siomi et al., 2011). In many model organisms,  
57 piRNAs are essential for fertility through their role in controlling TE proliferation  
58 in the germline(Weick and Miska, 2014)

59

60 The nematode *Caenorhabditis elegans* is a well-established model for small-RNA  
61 mediated silencing. piRNAs in *C. elegans* are unusual in that the two piRNA  
62 clusters on Chromosome IV are composed of individual RNA polymerase II (RNA  
63 pol II) transcription loci where each piRNA has its own upstream motif(Batista et  
64 al., 2008; Das et al., 2008; Ruby et al., 2006; Wang and Reinke, 2008). piRNA  
65 clusters are located within H3K27me3-rich chromatin, which, together with cis-  
66 acting RNA pol II pausing sequences downstream of the piRNA, enforce  
67 production of ~28 nucleotide piRNA precursors (Beltran et al., 2019[ref to be  
68 inserted after pub]). piRNA precursors are further trimmed to result in mature  
69 21 nucleotide piRNAs with a Uracil as the first nucleotide (21U-RNAs), which  
70 associate with the *C. elegans* Piwi protein PRG-1(Batista et al., 2008; Das et al.,  
71 2008; Wang and Reinke, 2008). Downstream of PRG-1, piRNA silencing relies on  
72 a nematode-specific class of secondary small RNAs known as 22G-RNAs(Das et  
73 al., 2008). 22G-RNA synthesis is carried out by RNA-dependent RNA  
74 polymerases using the target RNA as a template, following initiation by piRNA  
75 target recognition(Pak and Fire, 2007). 22G-RNAs bind to Argonaute proteins  
76 and lead to transcriptional and post-transcriptional silencing of target  
77 RNAs(Yigit et al., 2006). Additionally 22G-RNAs can be transmitted  
78 transgenerationally(Buckley et al., 2012) and as a result piRNA-initiated  
79 silencing can persist for many generations even after piRNAs themselves are

80 removed by mutating PRG-1(Ashe et al., 2012; Luteijn et al., 2012; Shirayama et  
81 al., 2012). Consequently whilst removal of piRNAs alone has mild effects on TE  
82 expression, combining mutations of PRG-1 with mutations disrupting the 22G-  
83 RNA biogenesis machinery leads to reactivation of several TEs(de Albuquerque  
84 et al., 2015; Phillips et al., 2015)

85

86 Despite the threat posed by TEs to genome integrity, many events in adaptive  
87 evolution have been linked to TE insertions. Across a variety of species,  
88 individual examples have been documented whereby TE insertions can rewire  
89 gene expression leading to differences both within and between species that can  
90 be positively selected for. On a more widespread level, up to 60% of human-  
91 specific enhancers may be TE-derived(Rebollo et al., 2011) and TE insertions  
92 have been proposed to substantially rewire the human immune cell  
93 transcriptome(Imbeault et al., 2017). Such observations have led to the  
94 speculation that TEs are retained within eukaryotic genomes because of their  
95 potential contribution to “evolvability”(Fablet and Vieira, 2011). However, this  
96 idea is still unproven, and a strong null hypothesis is that TEs are generally  
97 detrimental and beneficial TE insertions appear overrepresented due to the  
98 effects of natural selection in weeding out deleterious insertions(Simonti et al.,  
99 2017)

100

101 In the context of the uncertainty surrounding the contribution of TE mobility and  
102 expression to organismal fitness, it is important to understand the extent to  
103 which the balance between TE expression and TE regulation is under selection.  
104 One way to study this is to use a mutation accumulation (MA) framework in  
105 which replicate lines descended from a single common ancestor are propagated  
106 under a regime of drastic population bottlenecks for several hundred  
107 generations(Halligan and Keightley, 2009; Katju and Bergthorsson, 2019). The  
108 maintenance of these lines at a minimal population size attenuates the efficacy of  
109 selection, thereby enabling the accumulation of a large, unbiased sample of  
110 spontaneous mutations under conditions of genetic drift which can subsequently  
111 be identified and their fitness effects investigated. Previous studies in single-  
112 celled organisms and multicellular model organisms have used the MA approach

113 to investigate the effect of mutations on protein-coding gene expression  
114 divergence(Denver et al., 2005; Landry et al., 2007; Rifkin et al., 2005). Here, we  
115 extend this approach to investigate the effect of mutations on TE expression  
116 divergence.

117

118 We created spontaneous MA lines of *C. elegans* that were descended from a  
119 single worm ancestor and propagated for ~400 generations under three  
120 population size treatments of  $N = 1$ , 10 and 100 individuals per generation(Katju  
121 et al., 2015). The varying population size treatment in the experiment permitted  
122 a manipulation of the strength of selection, with the  $N = 1$  lines evolving under  
123 close to neutral conditions (minimal selection) and an incremental increase in  
124 the strength of selection with increasing population size. We employed this  
125 framework to investigate how TE expression evolves under conditions of near  
126 neutrality and under the influence of increasing selection intensity. We show  
127 that overall TE expression increases in MA lines with the smallest population  
128 size. We further show that expression increase results in part from failure of  
129 piRNA-mediated silencing. Intriguingly, differences in the responses of different  
130 TEs to reduced piRNA-mediated silencing depend on the chromatin environment  
131 of the TE loci, such that TEs in repressed chromatin domains largely remain  
132 silent due to epigenetic memory imparted by 22G-RNAs, whilst in active  
133 chromatin domains, increased TE expression is much more likely to occur.  
134 Together our results demonstrate for the first time that robust TE control is  
135 under selection in animals. Importantly further, our results provide new insight  
136 into how the chromatin environment interacts with piRNA-mediated silencing to  
137 control TE expression.

138

## 139 **Results**

140

### 141 *Relaxed selection leads to increased TE expression*

142

143 In order to assess the effect of selection on TE expression, we generated  
144 mutation accumulation (MA) lines and propagated them by randomly selecting  $N$   
145 individuals at each generation, where  $N$  was either 1, 10 or 100(Katju et al.,

146 2015). Henceforth we refer to the three conditions as *N.1*, *N.10* or *N.100* (Figure  
147 1A). After 409 generations, we isolated RNA and performed RNA sequencing to  
148 investigate TE expression. All three conditions showed an increase in total TE  
149 expression relative to the pre-MA ancestral control; moreover, *N.1* had higher  
150 total TE expression than *N.10* or *N.100*. Across increasing population sizes, we  
151 observed a monotonic decrease in total TE expression (Jonckheere test for  
152 ordered medians; henceforth  $J_h$ ,  $p = 0.019$ ; Figure 1B). Similarly, linear  
153 regression analysis showed a significant negative correlation between increasing  
154 population size and TE expression (Linear regression; henceforth LR  $p = 0.023$   
155 Figure 1B). Protein-coding gene expression diverges during MA in a variety of  
156 model organisms including *C. elegans* (Denver et al., 2005; Rifkin et al., 2005;  
157 Landry et al., 2007; Hodgins-Davis et al., 2015). To test whether this effect also  
158 occurred for TEs in our dataset, we estimated the variation in the expression of  
159 each individual TE and each individual gene. To control for potential changes in  
160 the mean expression, which can affect noise, we calculated the Fano factor  
161  $[\text{var}(x)/\text{mean}(x)]$  within *N.1*, *N.10* and *N.100* lines separately. Fano factors for  
162 TEs and genes were higher in *N.1* lines than in *N.10* or *N.100* lines (TEs:  
163 Wilcoxon paired test  $p = 0.015$  and  $0.004$  for *N.10* and *N.100*; genes: Wilcoxon  
164 paired test  $p < 1e^{-16}$  for both *N.10* and *N.100*; Supplemental Figure 1A and B). To  
165 control for the possibility that the larger number of *N.1* lines might lead to higher  
166 variance, we calculated TE fano factors from 1,000 subsets of five *N.1* lines and  
167 all 252 subsets of five *N.10* lines and compared these to the five *N.100* lines. This  
168 showed the same trend as the full dataset (Supplemental Figure 1C). To further  
169 investigate the variation in expression we calculated the total variance in the  
170 change in expression of all TEs or all genes between each line and the pre-MA  
171 ancestral control. Variance in the differences in both TE and gene expression  
172 increased with smaller population sizes ( $J_h$   $p = 0.008$  and  $0.009$ , respectively)  
173 (Supplemental Figure 1 D,E). However, importantly, there was no correlation in  
174 overall variance between TEs and genes in the same line (Supplemental Figure  
175 1F), showing that TE expression and gene expression diverge independently.

176

177 In order to understand loss of repression of TE expression in more detail,  
178 we classified TEs into different families using RepeatMasker annotations and

179 compared the median TE expression for each TE family across different lines. TE  
180 expression was compared between  $N=1$  and  $N>1$  and tested for monotonic  
181 median increase with decreasing population size. As expected, the majority of  
182 TEs that showed a significant difference between  $N=1$  and combined  $N=10$  and  
183  $N=100$  lines had increased expression in  $N=1$  compared to the other lines (Figure  
184 1C and Supplemental Figure 2). However, individual TEs displayed different  
185 patterns of expression change. Some TEs, notably the DNA transposon Turmoil2,  
186 showed more consistent increases across the  $N=1$  lines (Figure 1D). Indeed, the  
187 majority of the total effect on TE expression seen in Figure 1B could be  
188 attributed to one TE family, the Turmoil2 TEs, which showed a large expression  
189 increase across the majority of the  $N=1$  lines (Figure 1C,D). Contrastingly some  
190 TEs, notably the Mariner family DNA transposon Tc1, showed a burst-like  
191 pattern of expression where a large increase in expression was observed in a few  
192  $N=1$  lines whilst Tc1 remained low in expression in the remainder (Figure 1E).

193

194 We next investigated the timecourse of TE desilencing during  
195 propagation of the MA lines. We performed gene expression analysis by RNAseq  
196 on 11  $N=1$  population size lines at 25 and 100 generations. Median total TE  
197 expression showed a highly significant increase with increasing numbers of  
198 generations (Jh  $p = 1.1e-9$ ; Figure 1F). Linear regression analysis confirmed a  
199 positive relationship between increased numbers of generations and increased  
200 TE expression (LR  $p = 6.7e-8$ ; Figure 1F). Different TEs showed different kinetics  
201 of desilencing. Turmoil2 showed a positive relationship between increased  
202 numbers of generations and increased expression (LR  $p = 3.9e-3$ ) and a  
203 monotonic increase in median expression (Jh  $p = 2.55e-3$ ; Figure 1G).  
204 Contrastingly, Tc1 desilencing did not show a positive linear relationship  
205 between increased generations and increased expression (LR  $p = 0.13$ ; Figure  
206 1H) though there was a significant increase in median expression (Jh  $p = 4.22e-$   
207 6).

208

209 We further investigated whether the expression of TEs in individual MA  
210 lines correlated with the expression of other TEs. The majority of TEs showed  
211 little correlation with the expression of other TEs (Figure 2). The TEs with the

212 most statistically significant increases in expression, Turmoil2 and non-LTR  
213 retrotransposons of the LINE2 family (Figure 1C and Supplemental Figure 2)  
214 clustered together (Figure 2) suggesting coregulation of these TE families  
215 despite their different mechanisms of replication.

216

217 *Expression of TEs is weakly associated with increased copy-number*

218

219 TEs are capable of replicating independently of the host genome and thus  
220 their copy-number might change across MA lines. We sequenced the genomes of  
221 the MA lines after 400 generations and mapped the reads to consensus TE  
222 sequences thereby obtaining estimates of copy-number variation (CNV) for each  
223 TE family. Median TE copy-number increased with decreasing population size  
224 (Jh  $p = 1e-7$ ; LR  $p=1e-3$  Figure 3A). Within the *N.1* lines, there was a weak  
225 significant positive correlation between increased copy-number and increased  
226 expression. In contrast, we found no significant correlation between copy-  
227 number and expression in the *N.10* or *N.100* lines (Figure 3B). Moreover,  
228 increased expression of specific TEs in individual MA lines was often  
229 unaccompanied by increased copy-number (Figure 3C,D). We conclude that  
230 increased TE copy number is not the primary cause of increased TE expression.

231

232 *Alterations in small RNA levels are associated with TE expression changes*

233

234 Since changes in TE copy number are unlikely to explain altered TE  
235 expression, we investigated whether changes in regulation of TE expression  
236 could explain the loss of silencing observed during mutation accumulation. In *C.*  
237 *elegans*, piRNAs and 22G-RNAs are important small RNA classes involved in TE  
238 silencing(de Albuquerque et al., 2015; Bagijn et al., 2012; Das et al., 2008; Phillips  
239 et al., 2015). To test whether piRNAs are important in the loss of silencing of TEs  
240 in *N.1* lines, we remapped recently published cross-linking immunoprecipitation  
241 (CLIP) data(Shen et al., 2018) to identify TE transcripts that are bound by piRNA-  
242 Piwi complexes *in vivo*. Approximately 25% of TE transcripts with RNAseq  
243 reads were targeted by piRNAs. TEs targeted by piRNAs showed a statistically  
244 significant increase in total expression in *N.1* lines (Jh  $p = 0.02$ ; LR  $p = 0.033$ ;

245 Figure 4A) whilst TEs that were not targeted by piRNAs were not significantly  
246 altered (Jh  $p = 0.47$ , LR  $p = 0.27$ ; Figure 4B).

247

248 We tested whether defective piRNA-mediated silencing might account for  
249 increased expression of TEs targeted by piRNAs. piRNAs in *C. elegans* are  
250 expressed from individual promoters as a result of RNA polymerase II  
251 transcription (Billi et al., 2013; Cecere et al., 2012; Gu et al., 2012). We  
252 considered two potential mechanisms that might give rise to altered piRNAs.  
253 One possibility is that mutations in the piRNA sequences might occur in  
254 individual lines, which might affect their ability to recognise transposable  
255 elements and thus interfere with TE silencing. There was a trend for *N.1* lines to  
256 have more mutations in piRNAs than *N.10* or *N.100* lines (Supplemental Figure  
257 3). However, the trend was not significant (Jh  $p > 0.05$ ). Moreover, we identified  
258 on average only 1.1 piRNA sequences with mutations across the *N.1* lines. Thus  
259 we conclude that the increase in TE expression is unlikely to be related to  
260 mutations in specific piRNAs.

261

262 We next considered the expression of individual piRNA loci. We  
263 identified piRNA loci with significantly altered median expression between *N.1*  
264 lines and *N.10* and *N.100* lines combined using the Wilcoxon unpaired test. A  
265 small percentage of piRNA loci showed significant differences but overall there  
266 was no trend for these loci to show reduced expression in the *N.1* lines; indeed  
267 these loci were more likely to have higher expression in the *N.1* lines (Figure 4C).  
268 There was also no change in the expression of piRNAs identified by CLIP (Shen et  
269 al., 2018) to be directly binding to TEs (Figure 4D). Thus changes in piRNA  
270 expression are unlikely to explain the changes we observed in TE expression.

271

272 22G-RNAs act downstream of piRNAs to bring about target silencing (Das et al.,  
273 2008). Surprisingly, although 22G-RNAs silence TEs, we found that the total  
274 levels of 22G-RNAs mapping to TEs were increased in lines with smaller  
275 population sizes (Jh  $p = 0.05$ , LR  $p = 0.068$ ; Figure 4E). To examine this in more  
276 detail, we analysed 22G-RNAs at individual TEs. The majority of TEs showing  
277 significantly increased 22G-RNAs in *N.1* lines were non-LTR transposons (Figure



278 4F). Notably, these TEs were not significantly increased in transcript levels in  
279 the *N.1* lines (Figure 1C; Supplemental Figure 2). Thus, the global increase in  
280 22G-RNA levels does not relate directly to the increased transcript levels of TEs  
281 in *N.1* lines.

282

283 To compare directly how increased expression of TEs relates to 22G-RNA  
284 mediated silencing, for each TE we compared 22G-RNA levels in lines with  
285 increased expression to 22G-RNA levels in lines without increased expression.  
286 The only TE showing alterations in both expression and 22G-RNA levels was  
287 Turmoil2. Turmoil2 showed decreased small RNA levels in lines showing  
288 increased Turmoil2 expression (Figure 4G). Thus, the increased transcript levels  
289 of Turmoil2 elements is associated with reduced 22G-RNAs. We conclude that  
290 the increased transcript levels of some TEs may be caused by reduced small  
291 RNA-mediated silencing, but that some increases in TE transcript levels occur  
292 independently of 22G-RNA changes.

293

294

295 *Chromatin environment determines relationship between 22G-RNA levels and TE*  
296 *expression*

297

298 We investigated what determines the different changes in 22G-RNAs at  
299 different TE types. 22G-RNAs interact with chromatin modifying factors to  
300 control expression of TEs(McMurphy et al., 2017). piRNA-mediated silencing has  
301 been directly linked to the generation of H3K9me2/3 marked nucleosomes  
302 (“classical heterochromatin”) and this has been proposed to be important for  
303 transcriptional silencing induced by piRNAs(Ashe et al., 2012; McMurphy et al.,  
304 2017; Shirayama et al., 2012; Woodhouse et al., 2018). Additionally, it is  
305 becoming clear that a large proportion of the autosomal DNA in *C. elegans* can be  
306 divided into active domains, containing H3K36me3 and germline expressed  
307 genes and regulated domains, containing H3K27me3 marked nucleosomes and  
308 silent genes(Evans et al., 2016; Liu et al., 2011). These domains are largely  
309 stable through development, including in adult germline(Evans et al., 2016;  
310 Rechtsteiner et al., 2010). We examined the influence of these three types of

311 chromatin on the response of TEs to mutation accumulation. TEs in regulated  
312 domains and in classical heterochromatin showed no significant overall increase  
313 in expression (Figure 5A,B). The rare examples of *N*.1 lines showing significantly  
314 higher expression of TEs in classical heterochromatin corresponded to lines in  
315 which Tc1 reactivation occurred, consistent with enrichment of Tc1 elements  
316 within these regions (McMurchy et al., 2017). Contrastingly, TEs in active  
317 domains had significantly higher expression in *N*.1 than *N*>1 lines (Wilcoxon  
318 unpaired test,  $p = 0.02$ ). There was also a trend towards decreased median  
319 expression with increasing population size although this was on the border of  
320 significance (Jh,  $p = 0.056$ , LR  $p=0.064$ ; Figure 5C).

321

322 We next examined 22G-RNAs mapping to TEs across different chromatin  
323 domains. TEs in repressed domains showed significantly increased levels of  
324 22G-RNAs in *N*.1 lines relative to *N*.10 and *N*.100. However, in active domains  
325 there was no significant change in 22G-RNA levels (Figure 5D,E,F). Thus  
326 increased 22G-RNAs occur predominantly in TEs within repressed chromatin.

327

328

329 *AT-rich sequences in TEs reduce 22G-RNA generation*

330

331 A recent study has demonstrated that silencing of both transgenes and  
332 endogenous genes by 22G-RNAs is inhibited by a high content of periodic repeats  
333 of AT-rich sequences, known as PATCs (Frøkjær-Jensen et al., 2016). We tested  
334 how PATC density within TEs influenced their expression under reduced  
335 selection. High PATC density corresponded to reactivation of TEs (Jh  $p = 0.018$ ,  
336 LR  $p=0.02$ ) whereas TEs with low PATC density did not show an increase in  
337 expression (Figure 6A). Contrastingly, only TEs with low PATC density showed  
338 significantly increased 22G-RNAs in *N*.1 lines relative to *N*.10 and *N*.100 (Jh  $p =$   
339  $0.018$ , LR  $p=0.011$ ; Figure 6B). Importantly this effect was specific to PATC  
340 sequences as GC-content alone had no significant effect on either TE expression  
341 or small RNA generation (Supplemental Figure 4A,B). We conclude that low  
342 PATC density is required for 22G-RNA generation, which may be required to  
343 restrain TE activation. We tested whether the chromatin environment

344 modulated the effect of PATC sequences on TE reactivation in MA lines.  
345 Importantly, PATC content was similar in TEs across active, classic  
346 heterochromatin and regulated domains (Supplemental Figure 4C). 22G-RNAs  
347 were significantly increased in low PATC regions within regulated domain (Jh  
348  $p=0.018$ , LR =0.11) and classical heterochromatin domains (Jh  $p=0.055$ , LR  
349  $p=0.035$ ) but not in active domains. In contrast there were no significant  
350 changes in 22G-RNA levels in high PATC regions within these domains (Figure  
351 6C,D). Thus generation of increased 22G-RNAs against TEs in MA lines is  
352 promoted by both low PATC content and a repressive chromatin environment.

353

354

355 *Epigenetic memory of piRNA silencing correlates to compensatory 22G-RNA*  
356 *biogenesis*

357

358 On the basis of these results we hypothesised that reactivation of TEs in  
359 repressed chromatin regions may be restrained by a response whereby  
360 increased 22G-RNAs are generated from TEs with low PATC content. In contrast,  
361 loss of 22G-RNAs from TEs with higher PATC content can lead to their  
362 reactivation in *N.1* lines. The compensatory increase in 22G-RNAs is reminiscent  
363 of recent results showing that silencing initiated by piRNAs can become  
364 independent of the piRNA pathway due to the ability of 22G-RNAs to be  
365 transmitted across generations(Ashe et al., 2012; Luteijn et al., 2012; Shirayama  
366 et al., 2012). As a result, some genes and TEs show unchanged or even increased  
367 levels of 22G-RNAs when piRNAs are removed whilst a functional 22G-  
368 biogenesis machinery is still present(de Albuquerque et al., 2015; Phillips et al.,  
369 2015). These 22G-RNAs can only be removed by mutating the 22G-RNA  
370 biogenesis machinery. However, if the 22G-RNA biogenesis machinery is  
371 subsequently reintroduced into a background lacking piRNAs, 22G-RNAs cannot  
372 be made indicating that piRNAs are required to initiate their silencing(de  
373 Albuquerque et al., 2015; Phillips et al., 2015). We used previously published  
374 small RNA sequencing data from these studies to test whether epigenetic  
375 memory of piRNA silencing might occur only in regulated domains and not active  
376 domains. TEs in active domains showed significantly reduced 22G-RNAs when

377 *prg-1* was deleted in the presence of 22G-RNA biogenesis factors (Wilcoxon  
378 Paired Test,  $p = 6e-5$ ) whilst TEs in repressed chromatin did not show an overall  
379 reduction (Wilcoxon Paired Test,  $p = 0.84$ ) (Figure 7A). Importantly however,  
380 TEs in all chromatin types showed a significant reduction in 22G-RNAs when the  
381 22G-RNA biogenesis machinery was reintroduced in the absence of piRNAs  
382 (Figure 7B). This suggests that the changes we observed in 22G-RNAs in MA are  
383 similar to changes in 22G-RNAs that occur as a result of loss of piRNAs in the  
384 context of functional 22G-RNA biogenesis factors.

385

## 386 **Discussion**

387

388 Our analysis of how the interplay between TE expression and TE silencing  
389 factors changes over 400 generations at small population sizes provides the first  
390 clear view of how TE expression diverges under reduced selection in animals.  
391 Additionally, closer analysis of how TE control mechanisms are affected in the  
392 MA lines offers new insight into the fundamental mechanisms of TE silencing in  
393 *C. elegans*, underlining the ability of evolutionary studies to derive fundamental  
394 molecular insights. Here we discuss each of these aspects of our work in turn.

395

### 396 *The effect of selection on TE expression*

397

398 Whilst TEs pose a threat to genome integrity, expression of TEs has been  
399 suggested to have positive roles in gene expression networks; indeed the ability  
400 of transposable element polymorphisms to rewire expression of some genes has  
401 led to speculation that eukaryotic genomes may even avoid complete silencing of  
402 TEs in order to facilitate this activity (Jacques et al., 2013). Here, we showed that,  
403 at least in *C. elegans*, TE expression drifts to higher, rather than lower expression  
404 under conditions of reduced selection. This demonstrates that, in general, low  
405 expression of TEs is under purifying selection. Of all the TEs showing changes in  
406 expression in MA lines, the only one showing a trend towards decreased  
407 expression in *N.1* lines than *N.10* or *N.100* was a non-LTR retrotransposon,  
408 Vingi-1 (Figure 1B); however, the expression of this element was actually lower  
409 in the starting population than in the *N.10* or *N.100* lines thus the significance of

410 this observation is unclear. Whilst it is possible that increased expression of TEs  
411 may become beneficial under certain conditions, such as fluctuating  
412 environmental conditions or pathogen infection, our observations strongly  
413 suggest that the expression of most TEs is largely detrimental and TE expression  
414 is under purifying selection. Thus our research would support the proposal that  
415 beneficial events of TEs within genomes represent the exception- “making the  
416 best of a bad job”- rather than the rule. However, an important possibility that  
417 remains to be tested is whether TE activation is beneficial under fluctuating  
418 environmental conditions as opposed to the stable environment of laboratory  
419 maintained MA lines.

420

421         Phenotypic analyses of previous *C. elegans* MA experiments suggest that  
422 the decline in fitness in  $N = 1$  lines results primarily from a few mutations of  
423 large effect (Estes et al., 2004; Halligan et al., 2003; Keightley and Cabellero,  
424 1997). Similar results have been obtained in experimental evolution studies in  
425 *Drosophila melanogaster* (Ávila and García-Dorado, 2002) and bacteria (Dillon  
426 and Cooper, 2016; Heilbron et al., 2014). In our study, purifying selection at  
427 larger population sizes ( $N.10$  and  $N.100$ ) would eliminate such large-effect  
428 mutations and indeed, our  $N.10$  and  $N.100$  lines exhibited no evidence of fitness  
429 reduction over the course of successive bottlenecks for 409 generations (Katju  
430 et al., 2015). Analysis of gene expression data from MA experiments from *C.*  
431 *elegans*, *D. melanogaster* and *S. cerevisiae* concluded that large effect mutations  
432 are also responsible for changes in protein-coding gene expression (Hodgins-  
433 Davis et al., 2015). However, our results for TE expression do not seem to fit  
434 with this model because overall TE expression, which is largely driven by  
435 Turmoil2 and non-LTR elements (see Figure 1), increases gradually with time  
436 across the  $N.1$  lines and is also increased, although less so, in  $N.10$  and  $N.100$   
437 lines. The expression of Tc1 is an exception to the overall trend as it is not  
438 affected in  $N.10$  or  $N.100$  lines but a small number of  $N.1$  lines show markedly  
439 increased Tc1 expression. Thus Tc1 reactivation may be dominated by a few  
440 mutations with large effect. This difference might be related to the different  
441 mechanism of silencing of Tc1 compared to Turmoil2 elements as discussed  
442 further below.

443

444 Previous theories on the effect of natural selection on TE polymorphisms  
445 have focussed on the copy-number of TEs as the major potential fitness  
446 penalty(Bartolomé et al., 2002; Charlesworth and Langley, 1986; Lee and  
447 Langley, 2010, 2012; Pasyukova et al., 2004). However, we observed that not all  
448 expression increases of TEs are linked to increasing copy-number; indeed many  
449 lines with very high expression of specific TEs display no evidence of increased  
450 copy-number at all. This suggests that many TEs replicate inefficiently in *C.*  
451 *elegans* such that even very large increases in expression levels do not  
452 automatically result in increased copy-numbers. As a corollary of this point, TE  
453 expression may be detrimental without directly posing a threat to genome  
454 integrity, potentially through effects on endogenous gene expression networks  
455 or through toxicity of repetitive RNA within the cell(Simon et al., 2014).

456

457 *Weakened piRNA silencing is responsible for increased expression of TEs under*  
458 *relaxed selection.*

459

460 Our investigations of the molecular mechanisms behind reduced silencing  
461 of TEs in MA lines strongly suggest that defective piRNA silencing is a major  
462 culprit. Only piRNA-targeted TEs show increased expression in MA lines, and,  
463 whilst piRNAs themselves do not seem to change significantly in MA lines, the  
464 levels of 22G-RNAs that act as effectors of piRNA silencing are perturbed at TEs  
465 showing increased expression. Why is piRNA silencing so vulnerable to mutation  
466 accumulation? TE silencing and TE activation in organisms are likely in a  
467 precarious equilibrium due to a constant evolutionary arms race between TEs  
468 and their host genome. As a result, many mutations could converge on the  
469 piRNA pathway to throw TE silencing out of balance.

470

471 *New insights into the role of chromatin in the piRNA pathway*

472

473 Our analysis of how mutation accumulation affects TE silencing provides  
474 novel insights into how the chromatin environment of TEs affects piRNA-  
475 mediated silencing in *C. elegans* (Figure 7C). Importantly, TEs in repressive

476 chromatin are much less prone to reactivation than those in active chromatin  
477 regions. Mechanistically this is because 22G-RNAs in repressive chromatin  
478 regions are stable or even increased, whilst 22G-RNAs mapping to TEs in active  
479 regions are reduced in MA lines with increased expression. We show that this  
480 also applies in a previously described experimental model where piRNAs are  
481 removed without removing the 22G-RNA pathway(Phillips et al., 2015). 22G-  
482 RNAs mapping to TEs within active domains are lost whereas those within  
483 repressed regions are maintained. This result may also explain why reactivation  
484 of Tc1 elements occurs less frequently than Turmoil2 elements, because Tc1  
485 elements are predominantly located in repressed domains and are therefore  
486 silenced more robustly.

487

488         What is the mechanism whereby silencing memory is supported in  
489 repressed chromatin regions? The simplest possibility is that silencing and  
490 generation of 22G-RNAs are directly promoted by repressive chromatin  
491 modifications. In line with this possibility a mutually reinforcing loop between  
492 H3K9 methylation and small RNAs is well documented in fission yeast(Bühler,  
493 2009), and H3K9 methylation factors contribute to silencing of transgenes in *C.*  
494 *elegans*(Ashe et al., 2012; McMurchy et al., 2017; Shirayama et al., 2012;  
495 Woodhouse et al., 2018) although the situation is more complicated for  
496 endogenous genes(Ni et al., 2014). However, our observations hold equally well  
497 for H3K27me3-repressed chromatin, which has not been directly linked to 22G-  
498 RNA silencing. We propose therefore that the nuclear small RNA pathway  
499 responds differently depending on whether surrounding genes are active or  
500 repressed to detect and quell aberrant gene activation. This model will be of  
501 interest for further mechanistic investigation of small-RNA mediated silencing in  
502 *C. elegans*.

503

504

505

506 *Figure Legends*

507

508 **Figure 1** Increased expression of transposable elements in mutation  
509 accumulation lines. **A** Diagram of mutation accumulation (MA) experimental  
510 design. **B** Overall transposable element expression in MA lines as a function of  
511 population size. **C** Volcano plot for individual TE genes coloured according to  
512 family. The p value is a Wilcoxon unpaired test comparing the median in *N*.1  
513 lines to *N*.10 and *N*.100. **D** Expression changes in Turmoil2 elements. The box  
514 shows interquartile range with a line at median and the whiskers extend to the  
515 furthest point  $\leq 1.5$  times the interquartile range from the median. **E** Expression  
516 changes in Tc1 elements. Boxplot as in D. **F** Total TE expression after different  
517 numbers of generations of mutation accumulation in lines with a population size  
518 of 1. **G** Turmoil2 expression after different numbers of generations of mutation  
519 accumulation with a population size of 1. **H** Tc1 expression after different  
520 numbers of generations of mutation accumulation with a population size of 1.  
521

522 **Figure 2** Heatmap showing the significance in correlation in expression between  
523 different TEs across all the MA lines. The colour intensity shows the significance  
524 of the Spearman's rank correlation coefficient with blue showing a negative  
525 correlation and orange a positive correlation.

526

527 **Figure 3** Copy-number increases are weakly associated with increased TE  
528 expression in MA lines. **A** Copy-number of TEs are increased with weaker  
529 selection. Data shows mean of TE copy-number across all TEs normalized to the  
530 mean across all lines. **B** Correlation between total change in TE copy-number  
531 across all TEs and total TE expression. **C&D** Representative examples (Turmoil2  
532 and non-LTR transposons) showing how copy-number changes in high or  
533 expression lines. High expression lines are defined as being  $>1$  standard  
534 deviation away from the mean expression across all lines.

535

536 **Figure 4** Perturbed 22G-RNAs are associated with changes in TE expression in  
537 MA lines. **A&B** Comparison of change in TE expression for piRNA targeted and  
538 non-piRNA targeted TEs. **C** Total piRNA levels in MA lines across different  
539 population sizes. **D** Levels of piRNAs shown to directly bind to TEs by CLIP-seq,  
540 across different population size MA lines. **E** Levels of 22G-RNAs mapping to all



541 TEs in MA lines at different population sizes. **F** Volcano plot showing the  
542 gradient of change in 22G levels as estimated by a linear model against the p-  
543 value for the linear model on the y axis. **G** 22G-RNAs mapping to Turmoil2 in  
544 lines showing increased Turmoil2 expression compared to lines where Turmoil2  
545 expression was not increased.

546

547 **Figure 5** Chromatin environment controls alterations in piRNA mediated  
548 silencing in MA lines. **A,B,C** Expression changes in TEs in Regulated  
549 (H3K27me3), Classic Heterochromatin (H3K9me2) and Active (H3K36me3)  
550 chromatin domains. *P*-values are Wilcoxon unpaired test. **D,E,F** Changes in TE-  
551 mapping 22Gs in Regulated, Classic Heterochromatin and Active domains.

552

553 **Figure 6 PATC content influences 22G-RNA generation in MA lines**

554 **A** Expression changes in TEs in 4 equal size bins of 21 TEs with decreasing PATC  
555 content. **B** 22G-RNAs across the bins used in A. **C** and **D** Stratification of bins  
556 from A and B into active (H3K36me3) and regulated (H3K27me3) chromatin  
557 domains. High PATC is the top bin and low PATC is the lowest bin.

558

559

560 **Figure 7 Chromatin and PATC together influence TE control in MA lines**

561 **A** Alterations in 22G-RNAs in the absence of *prg-1* whilst 22G-RNA biogenesis  
562 pathways are still active for TEs divided into Regulated, Classic Heterochromatin  
563 and Active domains. **B** Alterations in 22G-RNAs in the absence of both *prg-1* and  
564 22G-RNA biogenesis pathways for TEs from Regulated, Classic Heterochromatin  
565 and Active domains. Boxplots in A and B as in Figure 1D.

566 **C** Model for how chromatin environment contributes to TE desilencing in MA  
567 lines. Left- repressed chromatin domains, taking H3K27me3 enriched domains  
568 as an example. Right, Active chromatin domains.

569

570

571 Supplemental Figure 1

572 **A** Fano factor of individual TE transcript levels across all lines of the indicated  
573 population size; **B** Fano factor in individual protein-coding gene transcript levels

574 across all lines of the indicated population size. C Variance of TE transcript  
575 levels in 1000 samples of 5 N.1 lines, 253 samples of 5 N.10 lines [the maximum]  
576 and all 5 N.100 lines. D Total variance in transcript level differences between  
577 each TE and its corresponding value in the starting population across lines of  
578 different population size. D Total variance of transcript level differences  
579 between each protein-coding gene and the starting population in lines of the  
580 indicated population size. Boxplots for A-D are as in Figure 1D. E Variance in TE  
581 transcript changes relative to starting population compared to the variance in  
582 protein-coding gene transcript changes in the same line.

583 Supplemental Figure 2

584 Volcano plot showing the logarithm (base 10) p-value of a linear model relating  
585 population size to expression of TEs on the y axis to the gradient of the linear  
586 model on the x axis.

587 Supplemental Figure 3

588 Total piRNA reads showing one base pair mismatch to the reference sequence  
589 divided by the total number of mismatched loci, in MA lines across different  
590 population sizes

591 Supplemental Figure 4

592 A GC content does not affect expression of TEs. Bins with high to low GC content  
593 left to right. B GC content does not affect 22G-RNA levels. Bins with high to low  
594 GC content left to right. C No clear difference in the proportion of TEs from  
595 different chromatin domains within bins of different PATC content. D  
596 Expression of TEs from regulated, heterochromatic and active chromatin regions  
597 in the top PATC bin. E Expression of TEs from regulated, heterochromatic and  
598 active chromatin regions in the lowest PATC bin.

599 Additional Files

600 R code and input files required to generate the plots in the figures will be released  
601 along with final publication and are available upon reasonable request to  
602 [psarkies@imperial.ac.uk](mailto:psarkies@imperial.ac.uk)

603

604

605

606

## 607 **Methods**

608

### 609 **RNA Library Preparation, Sequencing, and Analysis of Transcript** 610 **Abundance.**

611

612 The library preparation and RNA-sequencing procedures have previously  
613 been described in detail (Konrad et al., 2018). Briefly, we isolated one, two, and  
614 three individuals each from populations of sizes  $N = 1, 10, \text{ and } 100$ , respectively.  
615 These 55 worms, as well as one individual from the ancestral population were  
616 each sequestered to NGM plates seeded with OP50, where they were allowed to  
617 self-fertilize and reproduce at 20°C. Three offspring worms at the L4 larval stage  
618 were isolated from each of the F<sub>1</sub> populations to serve as biological replicates.  
619 These 168 individual worm samples were allowed to reproduce for three  
620 generations to yield enough tissue for RNA extraction. A standard bleaching  
621 protocol was used to collect gravid eggs from adults in order to generate  
622 synchronized populations of L1 larvae. Total RNA was isolated from L1 larvae  
623 via the Qiagen RNeasy Mini Kit. The Nanodrop 2000, Qubit 3.0 Fluorometer, and  
624 an Agilent RNA Analyzer were used to evaluate the quality of the RNA samples,  
625 the and Illumina TruSeq RNA library Prep Kit v2 was used with standard  
626 procedures to prepare the RNA sequencing libraries for each sample at the Texas  
627 A&M University Genomics and Bioinformatics Services Center. The RNA was  
628 fragmented and Illumina adapters were annealed for amplification. Size selected  
629 cDNA fragments were isolated via a Qiagen Gel Extraction Kit. Finally,  
630 sequencing was performed on the Illumina HiSeq 4000 platform with default  
631 quality filters.

632 Demultiplexing and prefiltering of the sequencing reads was performed  
633 based on default Illumina QC protocols. Reads containing abnormally short  
634 insert lengths were removed, and adapters were discarded from the reads.

635 The raw RNA-sequencing reads in fastq format were aligned to the  
636 protein-coding transcriptome of *C. elegans* (Wormbase reference N2 genome  
637 version WS247) using TopHat(Trapnell et al., 2009) via the “very sensitive”  
638 bowtie2 algorithm with a maximum of one mismatch in the anchor region for  
639 each spliced alignment and a minimum and maximum intron length of 20 and  
640 3,000 bp, respectively. Cufflinks(Trapnell et al., 2010) with default settings and  
641 gene annotations from the N2 genome version WS247 was used to estimate the  
642 relative transcript abundance for each protein-coding gene. All following  
643 analyses were focused on FPKM values calculated on the per gene level. The  
644 relative transcript abundances (FPKM) from the three biological replicates for  
645 each original sample were averaged to get mean relative transcript abundance  
646 for each gene in that sample.

647

648

### 649 **Small RNA sequencing**

650 MA lines were synchronised using hypochlorite treatment and embryos were

651 isolated after 12 hours. RNA was extracted using trizol and small RNA libraries

652 were prepared using the Illumina Small RNA sequencing kit as described  
653 previously(Sarkies et al., 2015).  
654 Small RNAs were aligned to a genome built using bowtie from a fasta file  
655 containing all piRNAs, miRNAs, ncRNAs and genes including TEs, extracted from  
656 Wormbase (WS264; ce11), requiring perfect mapping. Reads mapping to the  
657 sense strand of ncRNAs and miRNAs were extracted using bedtools intersect -c -  
658 S. We used DEseq using ncRNAs and miRNAs to extract size factors. 22G-RNAs  
659 mapping to TEs and genes were extracted using a custom Perl script and the  
660 number of 22G-RNAs mapping antisense to each gene and TE was then counted  
661 using bedtools intersect -c -s. The 22G-RNAs were then normalized to the size  
662 factors from ncRNAs and miRNAs combined.

663

664 TE copy-number analysis

665 Alignments to determe TE copy number changes in MA lines.

666 DNA sequencing was aligned to a genome built using bowtie2-build from TE  
667 consensus sequences extracted from rebase combined with all coding  
668 sequences. Bowtie2 was used to map PE reads to this genome and the readcount  
669 mapping to each cds or TE was obtained using bedtools intersect -c.

670

671 Data integration

672

673 Computational analysis of TE expression and small RNA analysis

674 TEs from WS264 were annotated using Repeatmasker(Smit et al., 2017). All data  
675 analysis was conducted using the R environment for statistical analysis

676 ([www.Rproject.com](http://www.Rproject.com)). Details of the individual analyses are documented in the R  
677 markdown file accompanying this manuscript (additional file 1), with the raw  
678 data tables required to run these programs in as a zipped file (additional file 2).

679 Previously published datasets containing Chromatin domain annotations from  
680 Early Embryo ChiP-Seq were taken from(Evans et al., 2016) updated to WS264  
681 using liftover (<https://genome.ucsc.edu/>). Small RNA sequencing data from  
682 reactivation of small RNA pathways in the presence or absence of piRNAs was  
683 taken from (Phillips et al., 2015)and aligned to the *C. elegans* genome as  
684 described above. The average PATC score for each TE was calculated by taking

685 the average PATC score across the element from per-base sliding window  
686 genome-wide PATC scores from (Frøkjær-Jensen et al., 2016).

687

688 REFERENCES

689 de Albuquerque, B.F.M., Placentino, M., and Ketting, R.F. (2015). Maternal piRNAs  
690 Are Essential for Germline Development following De Novo Establishment of  
691 Endo-siRNAs in *Caenorhabditis elegans*. *Dev. Cell* 34, 448–456.

692 Ashe, A., Sapetschnig, A., Weick, E.M., Mitchell, J., Bagijn, M.P., Cording, A.C.,  
693 Doebley, A.L., Goldstein, L.D., Lehrbach, N.J., Le Pen, J., et al. (2012). PiRNAs can  
694 trigger a multigenerational epigenetic memory in the germline of *C. elegans*. *Cell*  
695 150, 88–99.

696 Ávila, V., and García-Dorado, A. (2002). The effects of spontaneous mutation on  
697 competitive fitness in *Drosophila melanogaster*. *J. Evol. Biol.* 15, 561–566.

698 Bagijn, M.P., Goldstein, L.D., Sapetschnig, A., Weick, E.M., Bouasker, S., Lehrbach,  
699 N.J., Simard, M.J., and Miska, E.A. (2012). Function, targets, and evolution of  
700 *Caenorhabditis elegans* piRNAs. *Science* (80-. ). 337, 574–578.

701 Bartolomé, C., Maside, X., and Charlesworth, B. (2002). On the Abundance and  
702 Distribution of Transposable Elements in the Genome of *Drosophila*  
703 *melanogaster*. *Mol. Biol. Evol.* 19, 926–937.

704 Batista, P.J., Ruby, J.G., Claycomb, J.M., Chiang, R., Fahlgren, N., Kasschau, K.D.,  
705 Chaves, D.A., Gu, W., Vasale, J.J., Duan, S., et al. (2008). PRG-1 and 21U-RNAs  
706 Interact to Form the piRNA Complex Required for Fertility in *C. elegans*. *Mol. Cell*  
707 31, 67–78.

708 Billi, A.C., Freeberg, M.A., Day, A.M., Chun, S.Y., Khivansara, V., and Kim, J.K.  
709 (2013). A Conserved Upstream Motif Orchestrates Autonomous, Germline-  
710 Enriched Expression of *Caenorhabditis elegans* piRNAs. *PLoS Genet.* 9.

711 Brennecke, J., Aravin, A.A., Stark, A., Dus, M., Kellis, M., Sachidanandam, R., and  
712 Hannon, G.J. (2007). Discrete Small RNA-Generating Loci as Master Regulators of  
713 Transposon Activity in *Drosophila*. *Cell* 128, 1089–1103.

714 Buckley, B.A., Burkhart, K.B., Gu, S.G., Spracklin, G., Kershner, A., Fritz, H., Kimble,  
715 J., Fire, A., and Kennedy, S. (2012). A nuclear Argonaute promotes  
716 multigenerational epigenetic inheritance and germline immortality. *Nature* 489,  
717 447–451.

718 Bühler, M. (2009). RNA turnover and chromatin-dependent gene silencing.  
719 *Chromosoma* 118, 141–151.

720 Cecere, G., Zheng, G.X.Y., Mansisidor, A.R., Klymko, K.E., and Grishok, A. (2012).  
721 Promoters Recognized by Forkhead Proteins Exist for Individual 21U-RNAs. *Mol.*  
722 *Cell* 47, 734–745.

723 Charlesworth, B., and Langley, C.H. (1986). The evolution of self-regulated

- 724 transposition of transposable elements. *Genetics* *112*, 359–383.
- 725 Das, P.P., Bagijn, M.P., Goldstein, L.D., Woolford, J.R., Lehrbach, N.J., Sapetschnig,  
726 A., Buhecha, H.R., Gilchrist, M.J., Howe, K.L., Stark, R., et al. (2008). Piwi and  
727 piRNAs Act Upstream of an Endogenous siRNA Pathway to Suppress Tc3  
728 Transposon Mobility in the *Caenorhabditis elegans* Germline. *Mol. Cell* *31*, 79–90.
- 729 Denver, D.R., Morris, K., Strelman, J.T., Kim, S.K., Lynch, M., and Thomas, W.K.  
730 (2005). The transcriptional consequences of mutation and natural selection in  
731 *Caenorhabditis elegans*. *Nat. Genet.* *37*, 544–548.
- 732 Dillon, M.M., and Cooper, V.S. (2016). The fitness effects of spontaneous  
733 mutations nearly unseen by selection in a bacterium with multiple  
734 chromosomes. *Genetics* *204*, 1225–1238.
- 735 Estes, S., Phillips, P.C., Denver, D.R., Thomas, W.K., and Lynch, M. (2004).  
736 Mutation Accumulation in Populations of Varying Size: The Distribution of  
737 Mutational Effects for Fitness Correlates in *Caenorhabditis elegans*. *Genetics* *166*,  
738 1269–1279.
- 739 Evans, K.J., Huang, N., Stempor, P., Chesney, M.A., Down, T.A., and Ahringer, J.  
740 (2016). Stable *Caenorhabditis elegans* chromatin domains separate broadly  
741 expressed and developmentally regulated genes. *Proc. Natl. Acad. Sci.* *113*,  
742 E7020--E7029.
- 743 Fablet, M., and Vieira, C. (2011). Evolvability, epigenetics and transposable  
744 elements. *Biomol. Concepts* *2*.
- 745 Frøkjær-Jensen, C., Jain, N., Hansen, L., Davis, M.W., Li, Y., Zhao, D., Rebora, K.,  
746 Millet, J.R.M., Liu, X., Kim, S.K., et al. (2016). An Abundant Class of Non-coding  
747 DNA Can Prevent Stochastic Gene Silencing in the *C. elegans* Germline. *Cell* *166*,  
748 343–357.
- 749 Gu, W., Lee, H.-C., Chaves, D., Youngman, E.M., Pazour, G.J., Conte, D., and Mello,  
750 C.C. (2012). CapSeq and CIP-TAP identify Pol II start sites and reveal capped  
751 small RNAs as *C. elegans* piRNA precursors. *Cell* *151*, 1488–1500.
- 752 Halligan, D.L., and Keightley, P.D. (2009). Spontaneous Mutation Accumulation  
753 Studies in Evolutionary Genetics. *Annu. Rev. Ecol. Evol. Syst.* *40*, 151–172.
- 754 Halligan, D., Peters, A., and Keightley, P. (2003). Estimating numbers of EMS-  
755 induced mutations affecting life history traits in *Caenorhabditis elegans* in  
756 crosses between inbred sublines. *Genet. Res.* *82*, 191–205.
- 757 Heilbron, K., Toll-Riera, M., Kojadinovic, M., and MacLean, R.C. (2014). Fitness is  
758 strongly influenced by rare mutations of large effect in a microbial mutation  
759 accumulation experiment. *Genetics* *197*, 981–990.
- 760 Hodgins-Davis, A., Rice, D.P., and Townsend, J.P. (2015). Gene Expression Evolves  
761 under a House-of-Cards Model of Stabilizing Selection. *Mol. Biol. Evol.* *32*, 2130–  
762 2140.

- 763 Imbeault, M., Helleboid, P.-Y., and Trono, D. (2017). KRAB zinc-finger proteins  
764 contribute to the evolution of gene regulatory networks. *Nature* 543, 550–554.
- 765 Jacques, P.-É., Jeyakani, J., and Bourque, G. (2013). The Majority of Primate-  
766 Specific Regulatory Sequences Are Derived from Transposable Elements. *PLoS*  
767 *Genet.* 9, e1003504.
- 768 Katju, V., and Bergthorsson, U. (2019). Old Trade, New Tricks: Insights into the  
769 Spontaneous Mutation Process from the Partnering of Classical Mutation  
770 Accumulation Experiments with High-Throughput Genomic Approaches.  
771 *Genome Biol. Evol.* 11, 136–165.
- 772 Katju, V., Packard, L.B., Bu, L., Keightley, P.D., and Bergthorsson, U. (2015).  
773 Fitness decline in spontaneous mutation accumulation lines of *Caenorhabditis*  
774 *elegans* with varying effective population sizes. *Evolution* (N. Y). 69, 104–116.
- 775 Katju, V., Packard, L.B., and Keightley, P.D. (2018). Fitness decline under osmotic  
776 stress in *Caenorhabditis elegans* populations subjected to spontaneous mutation  
777 accumulation at varying population sizes. *Evolution* (N. Y). 72, 1000–1008.
- 778 Keightley, P.D., and Cabellero, A. (1997). Genomic mutation rates for lifetime  
779 reproductive output and lifespan in *Caenorhabditis elegans*. *Proc. Natl. Acad. Sci.*  
780 *USA* 94, 3823–3827.
- 781 Konrad, A., Flibotte, S., Taylor, J., Waterston, R.H., Moerman, D.G., Bergthorsson,  
782 U., and Katju, V. (2018). Mutational and transcriptional landscape of spontaneous  
783 gene duplications and deletions in *Caenorhabditis elegans*. *Proc. Natl. Acad. Sci.*  
784 115, 7386–7391.
- 785 Landry, C.R., Lemos, B., Rifkin, S.A., Dickinson, W.J., and Hartl, D.L. (2007). Genetic  
786 properties influencing the evolvability of gene expression. *Science* (80-. ). 317,  
787 118–121.
- 788 Lee, Y.C.G., and Langley, C.H. (2010). Transposable elements in natural  
789 populations of *Drosophila melanogaster*. *Philos. Trans. R. Soc. B Biol. Sci.* 365,  
790 1219–1228.
- 791 Lee, Y.C.G., and Langley, C.H. (2012). Long-term and short-term evolutionary  
792 impacts of transposable elements on *Drosophila*. *Genetics* 192, 1411–1432.
- 793 Liu, T., Rechtsteiner, A., Egelhofer, T.A., Vielle, A., Latorre, I., Cheung, M.-S., Ercan,  
794 S., Ikegami, K., Jensen, M., Kolasinska-Zwierz, P., et al. (2011). Broad  
795 chromosomal domains of histone modification patterns in *C. elegans*. *Genome*  
796 *Res.* 21, 227–236.
- 797 Luteijn, M.J., van Bergeijk, P., Kaaij, L.J.T., Almeida, M.V., Roovers, E.F., Berezikov,  
798 E., and Ketting, R.F. (2012). Extremely stable Piwi-induced gene silencing in  
799 *Caenorhabditis elegans*. *EMBO J.* 31, 3422–3430.
- 800 McMurphy, A.N., Stempor, P., Gaarenstroom, T., Wysolmerski, B., Dong, Y.,  
801 Aussianikava, D., Appert, A., Huang, N., Kolasinska-Zwierz, P., Sapetschnig, A., et

- 802 al. (2017). A team of heterochromatin factors collaborates with small RNA  
803 pathways to combat repetitive elements and germline stress. *Elife* 6.
- 804 Ni, J.Z., Chen, E., and Gu, S.G. (2014). Complex coding of endogenous siRNA,  
805 transcriptional silencing and H3K9 methylation on native targets of germline  
806 nuclear RNAi in *C. elegans*. *BMC Genomics* 15, 1157.
- 807 Pak, J., and Fire, A. (2007). Distinct populations of primary and secondary  
808 effectors during RNAi in *C. elegans*. *Science* (80-. ). 315, 241–244.
- 809 Pasyukova, E.G., Nuzhdin, S. V., Morozova, T. V., and Mackay, T.F.C. (2004).  
810 Accumulation of transposable elements in the genome of *Drosophila*  
811 *melanogaster* is associated with a decrease in fitness. *J. Hered.* 95, 284–290.
- 812 Phillips, C.M., Brown, K.C., Montgomery, B.E., Ruvkun, G., and Montgomery, T.A.  
813 (2015). PiRNAs and piRNA-Dependent siRNAs Protect Conserved and Essential  
814 *C. elegans* Genes from Misrouting into the RNAi Pathway. *Dev. Cell* 34, 457–465.
- 815 Pritham, E.J. (2009). Transposable Elements and Factors Influencing their  
816 Success in Eukaryotes. *J. Hered.* 100, 648–655.
- 817 Rebollo, R., Romanish, M.T., and Mager, D.L. (2011). Transposable Elements: An  
818 Abundant and Natural Source of Regulatory Sequences for Host Genes. *Annu.*  
819 *Rev. Genet.* 46, 120913153128008.
- 820 Rechtsteiner, A., Ercan, S., Takasaki, T., Phippen, T.M., Egelhofer, T.A., Wang, W.,  
821 Kimura, H., Lieb, J.D., and Strome, S. (2010). The Histone H3K36  
822 Methyltransferase MES-4 Acts Epigenetically to Transmit the Memory of  
823 Germline Gene Expression to Progeny. *PLOS Genet.* 6, e1001091.
- 824 Rifkin, S.A., Houle, D., Kim, J., and White, K.P. (2005). A mutation accumulation  
825 assay reveals a broad capacity for rapid evolution of gene expression. *Nature*  
826 438, 220–223.
- 827 Ruby, J.G., Jan, C., Player, C., Axtell, M.J., Lee, W., Nusbaum, C., Ge, H., and Bartel,  
828 D.P. (2006). Large-Scale Sequencing Reveals 21U-RNAs and Additional  
829 MicroRNAs and Endogenous siRNAs in *C. elegans*. *Cell* 127, 1193–1207.
- 830 Sarkies, P., Selkirk, M.E., Jones, J.T., Blok, V., Boothby, T., Goldstein, B., Hanelt, B.,  
831 Ardila-Garcia, A., Fast, N.M., Schiffer, P.M., et al. (2015). Ancient and Novel Small  
832 RNA Pathways Compensate for the Loss of piRNAs in Multiple Independent  
833 Nematode Lineages. *PLoS Biol.* 13.
- 834 Shen, E.-Z., Chen, H., Ozturk, A.R., Tu, S., Shirayama, M., Tang, W., Ding, Y.-H., Dai,  
835 S.-Y., Weng, Z., and Mello, C.C. (2018). Identification of piRNA Binding Sites  
836 Reveals the Argonaute Regulatory Landscape of the *C. elegans* Germline. *Cell* 172,  
837 937–951.e18.
- 838 Shirayama, M., Seth, M., Lee, H.-C., Gu, W., Ishidate, T., Conte, D., and Mello, C.C.  
839 (2012). piRNAs initiate an epigenetic memory of nonself RNA in the *C. elegans*  
840 germline. *Cell* 150, 65–77.



- 841 Simon, M., Sarkies, P., Ikegami, K., Doebley, A.L., Goldstein, L.D., Mitchell, J.,  
842 Sakaguchi, A., Miska, E.A., and Ahmed, S. (2014). Reduced Insulin/IGF-1 Signaling  
843 Restores Germ Cell Immortality to *Caenorhabditis elegans* Piwi Mutants. *Cell*  
844 *Rep.* *7*, 762–773.
- 845 Simonti, C.N., Pavličev, M., and Capra, J.A. (2017). Transposable Element  
846 Exaptation into Regulatory Regions Is Rare, Influenced by Evolutionary Age, and  
847 Subject to Pleiotropic Constraints. *Mol. Biol. Evol.* *34*, 2856–2869.
- 848 Siomi, M.C., Sato, K., Pezic, D., and Aravin, A.A. (2011). PIWI-interacting small  
849 RNAs: the vanguard of genome defence. *Nat. Rev. Mol. Cell Biol.* *12*, 246.
- 850 Smit, A., Hubley, R., and Green, P. (2017). RepeatMasker Open-4.0.6 2013-2015 .  
851 [Http://Www.Repeatmasker.Org](http://www.Repeatmasker.Org).
- 852 Trapnell, C., Pachter, L., and Salzberg, S.L. (2009). TopHat: discovering splice  
853 junctions with RNA-Seq. *Bioinformatics* *25*, 1105–1111.
- 854 Trapnell, C., Williams, B. a, Pertea, G., Mortazavi, A., Kwan, G., van Baren, M.J.,  
855 Salzberg, S.L., Wold, B.J., and Pachter, L. (2010). How Cufflinks works. *Nat.*  
856 *Biotechnol.* *28*, 511–515.
- 857 Wang, G., and Reinke, V. (2008). A *C. elegans* Piwi, PRG-1, Regulates 21U-RNAs  
858 during Spermatogenesis. *Curr. Biol.* *18*, 861–867.
- 859 Weick, E., and Miska, E. a (2014). piRNAs : from biogenesis to function. *Genes*  
860 *Dev.* 1–41.
- 861 Woodhouse, R.M., Buchmann, G., Hoe, M., Harney, D.J., Low, J.K.K., Larance, M.,  
862 Boag, P.R., and Ashe, A. (2018). Chromatin Modifiers SET-25 and SET-32 Are  
863 Required for Establishment but Not Long-Term Maintenance of  
864 Transgenerational Epigenetic Inheritance. *Cell Rep.* *25*, 2259–2272.e5.
- 865 Yigit, E., Batista, P.J., Bei, Y., Pang, K.M., Chen, C.-C.G., Tolia, N.H., Joshua-Tor, L.,  
866 Mitani, S., Simard, M.J., and Mello, C.C. (2006). Analysis of the *C. elegans*  
867 Argonaute family reveals that distinct Argonautes act sequentially during RNAi.  
868 *Cell* *127*, 747–757.
- 869

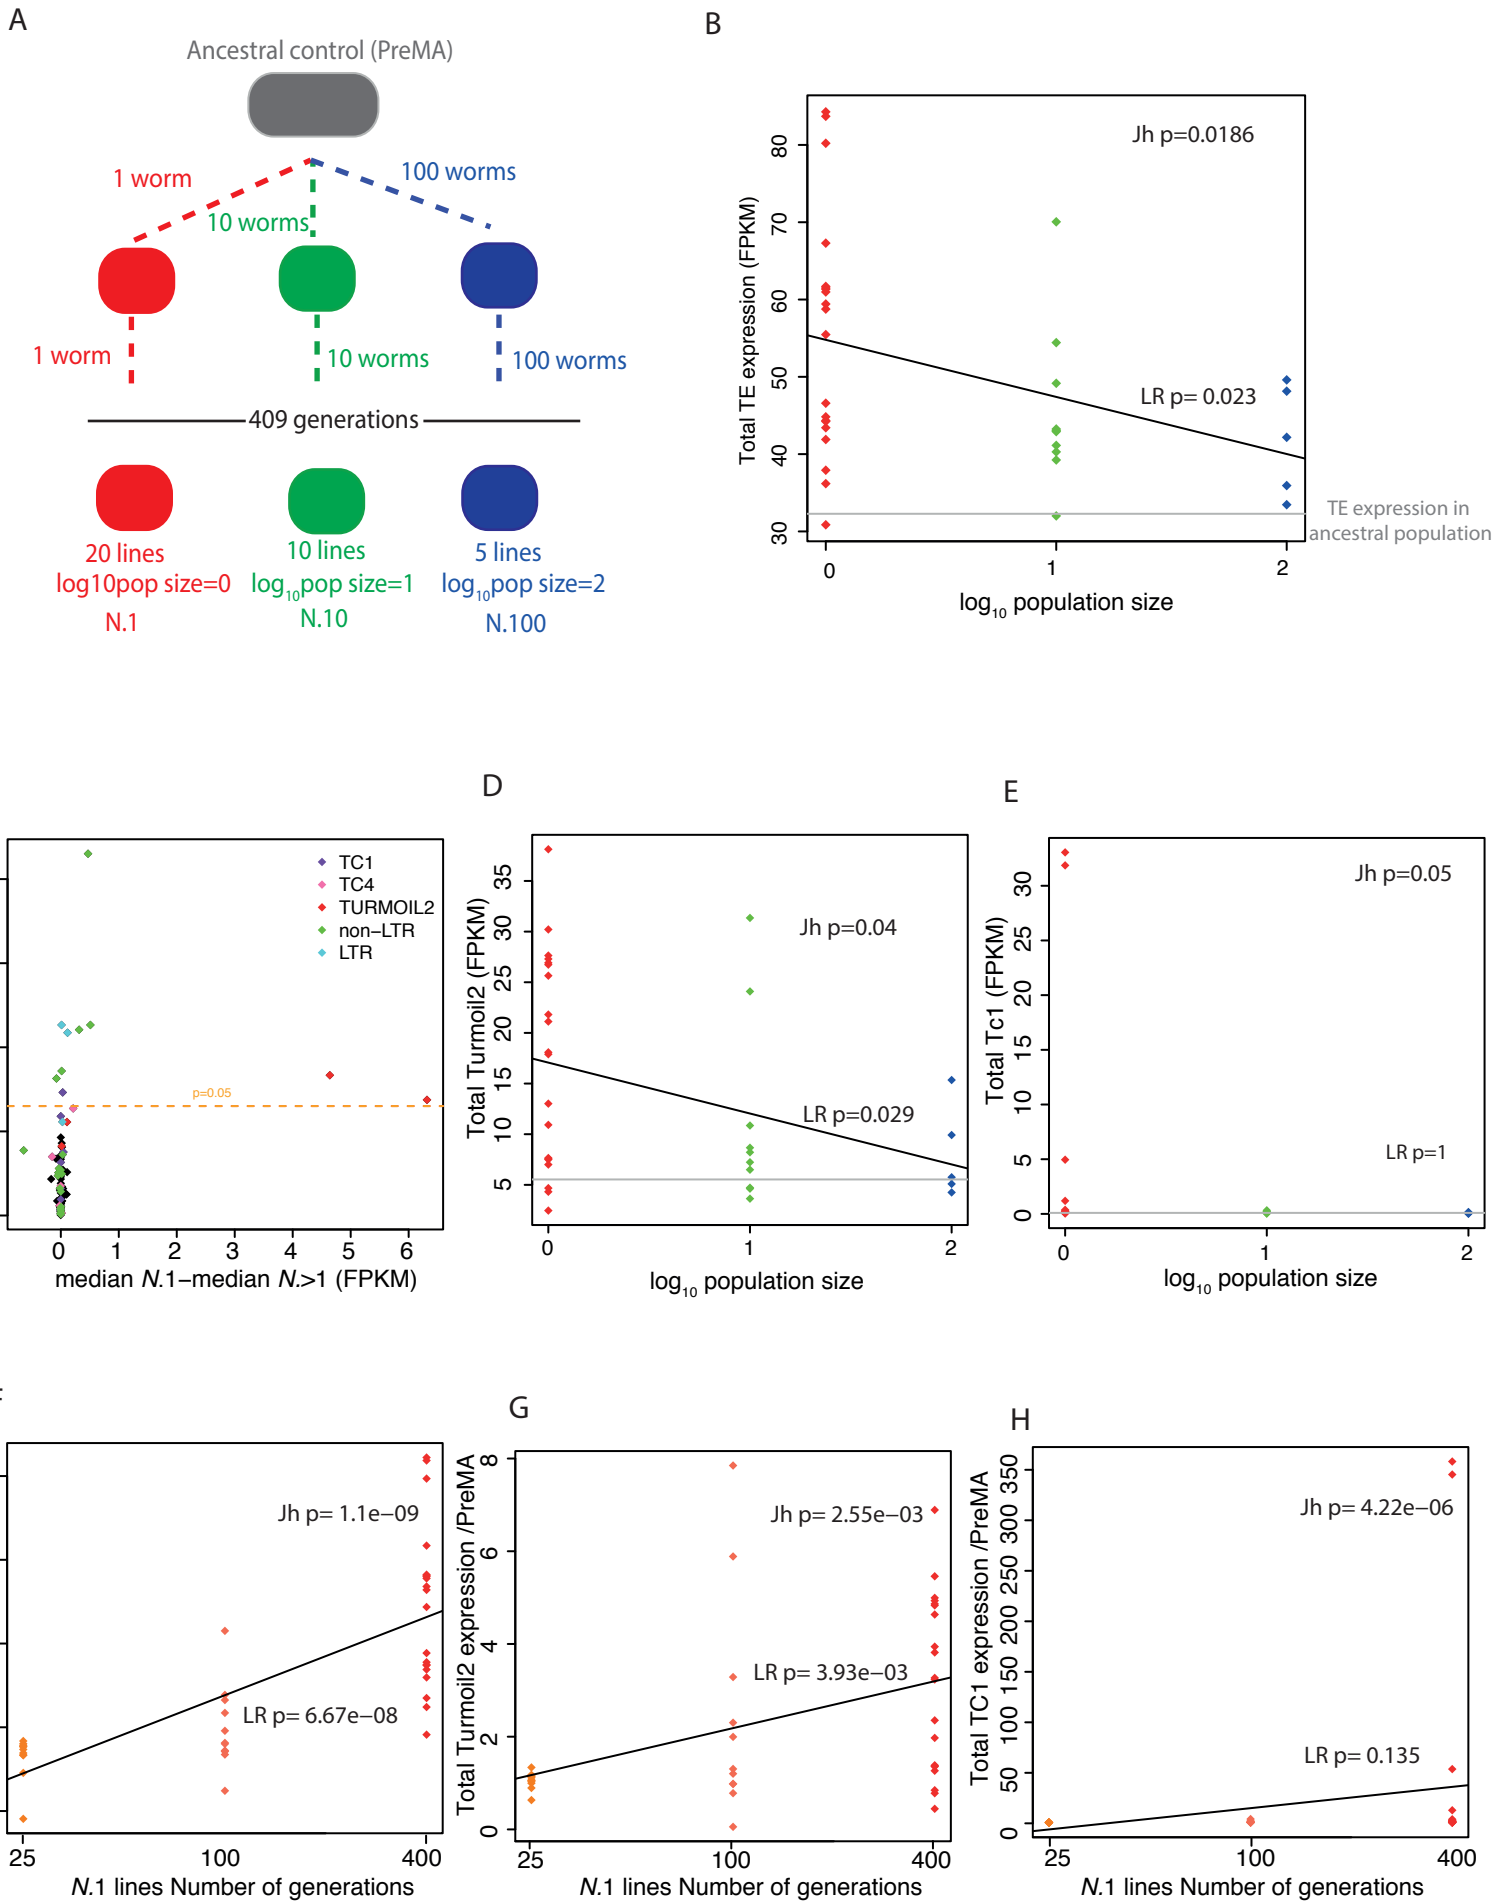

Figure 1

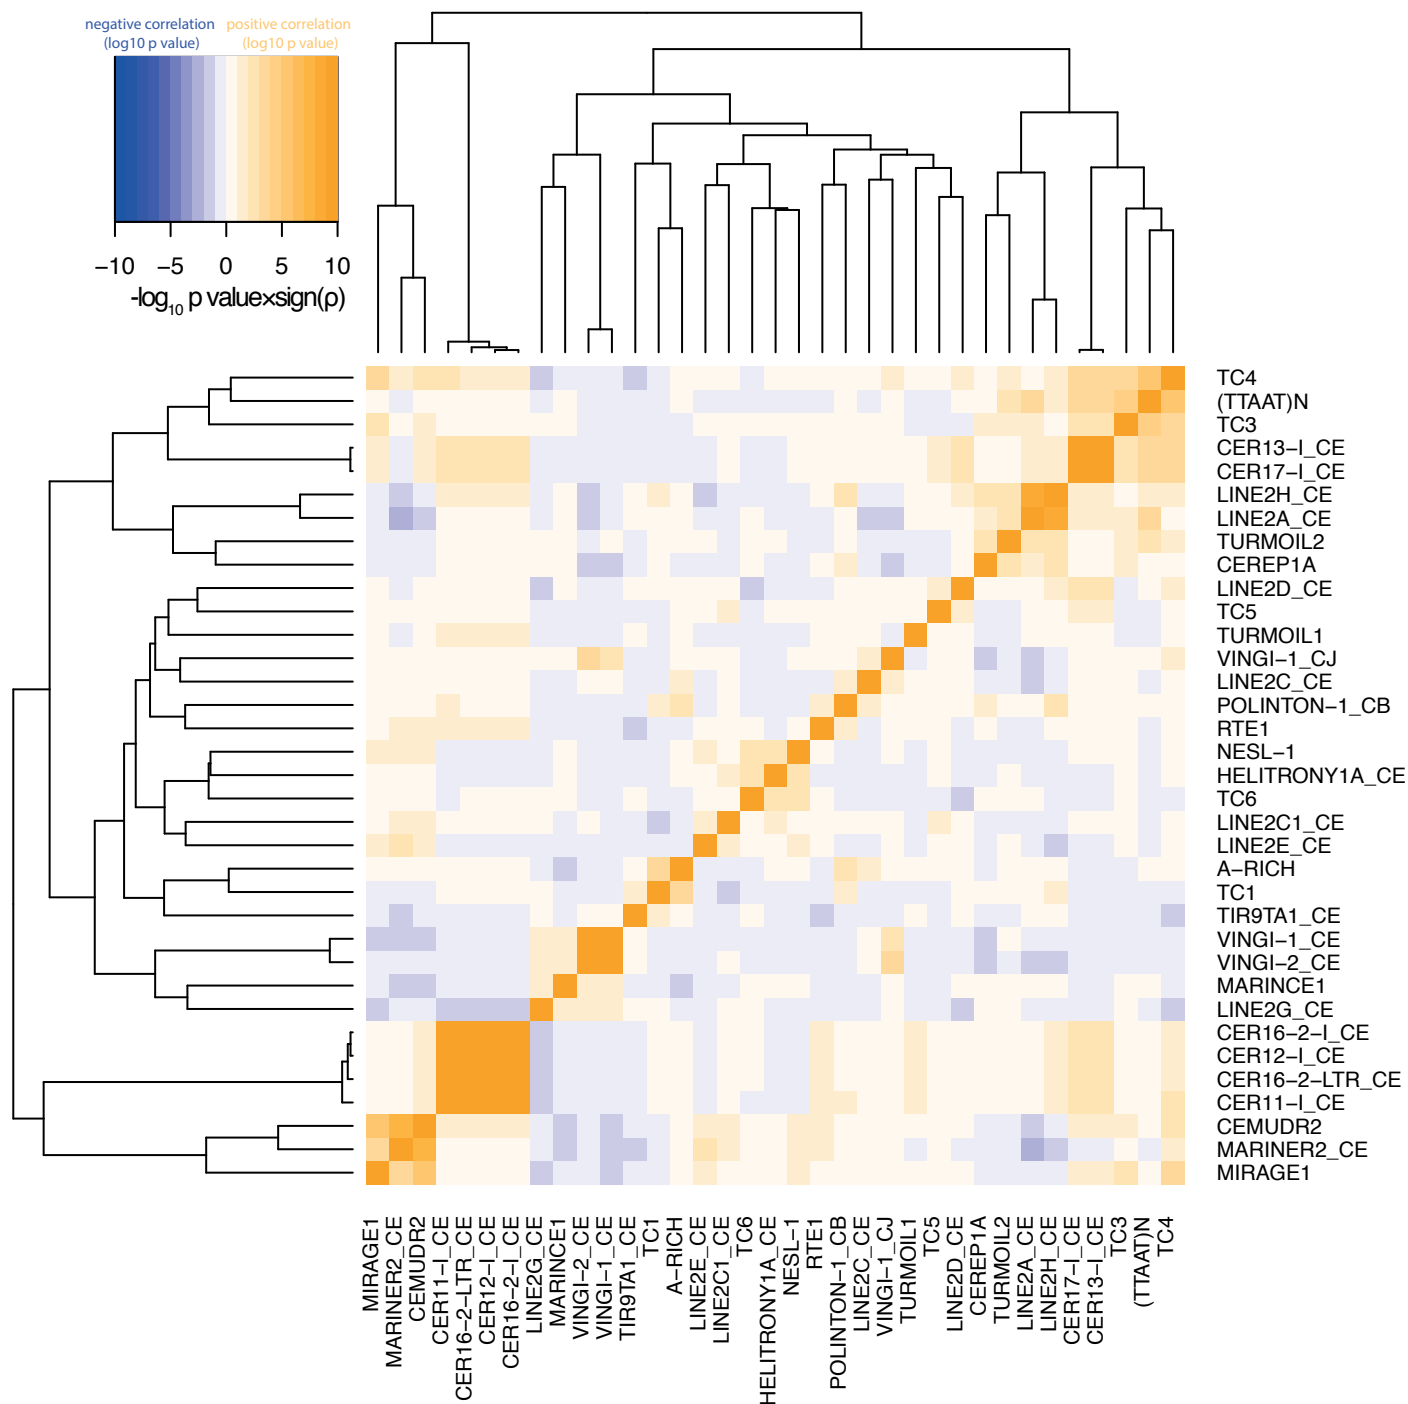

Figure 2

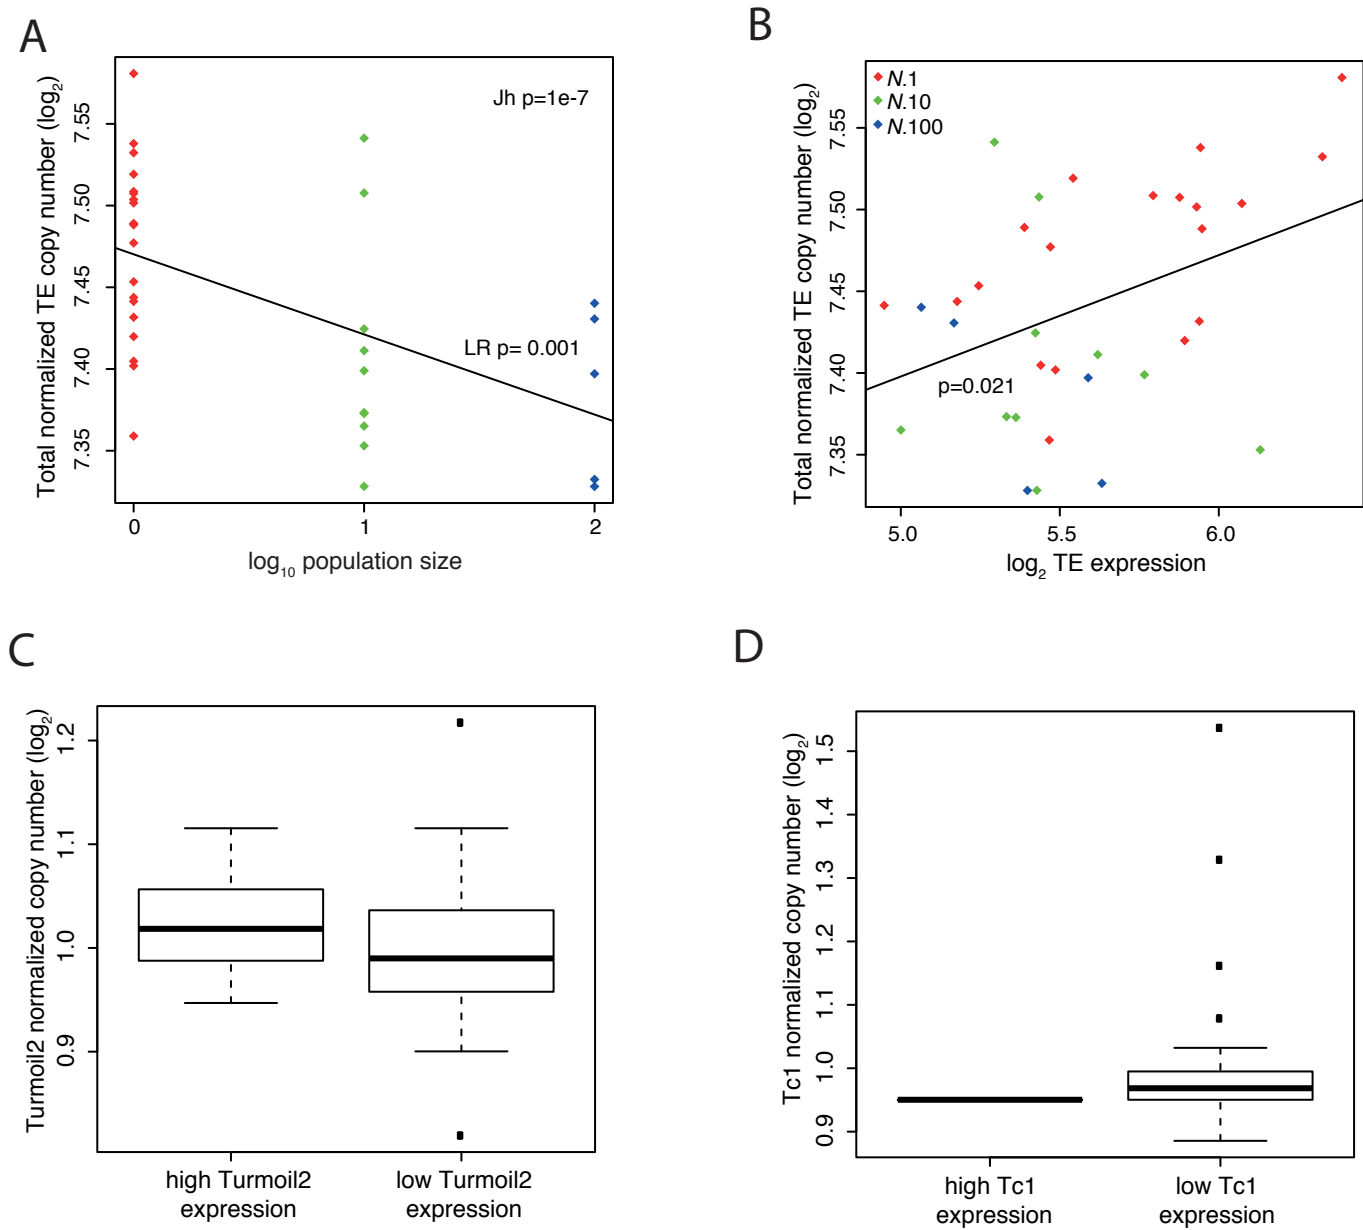

Figure 3

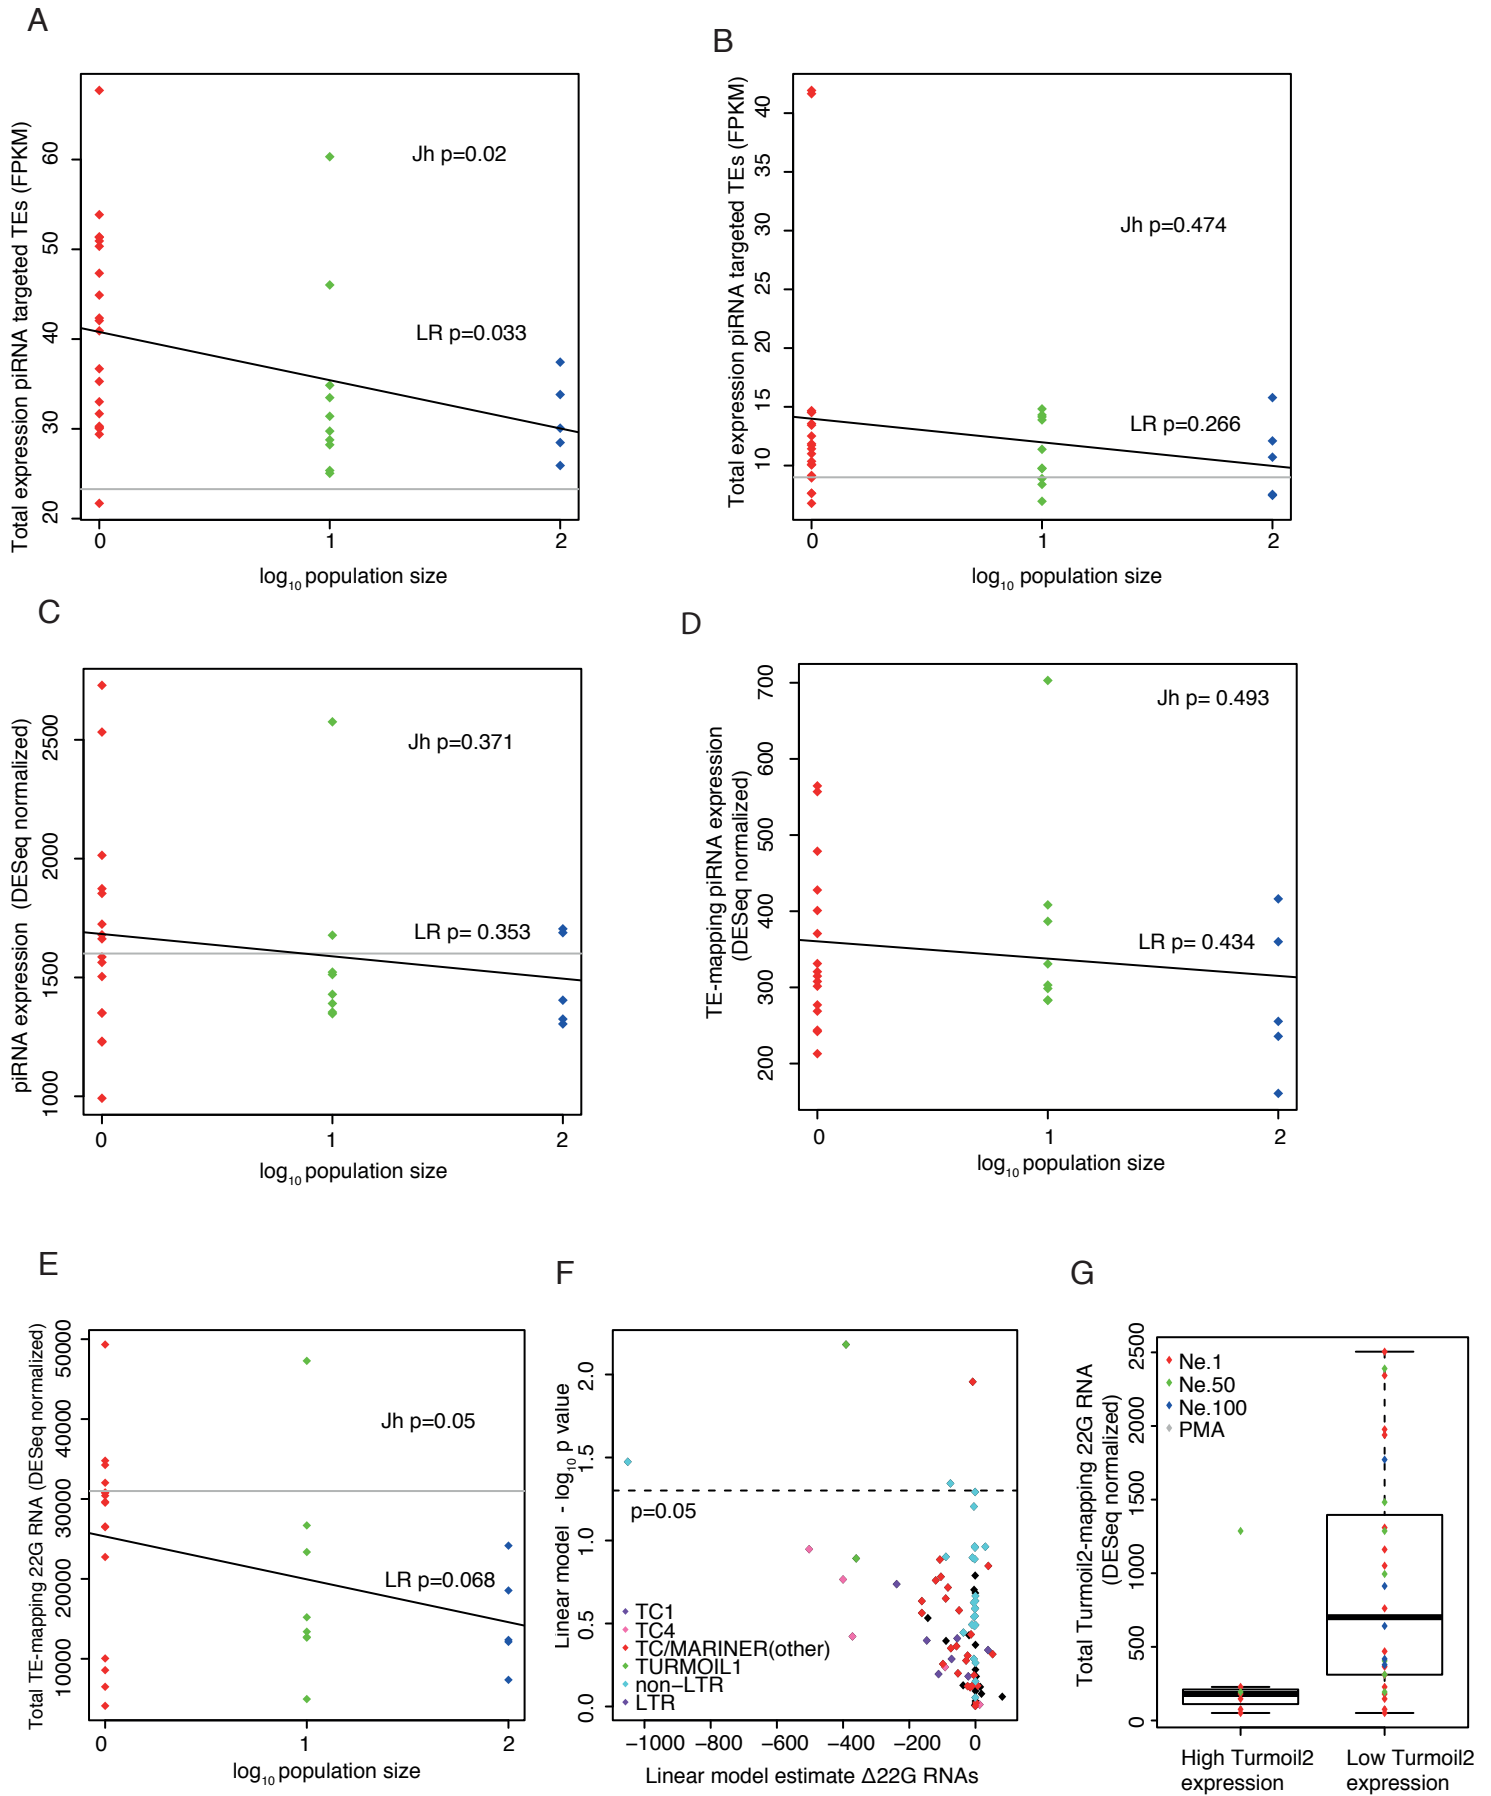

Figure 4

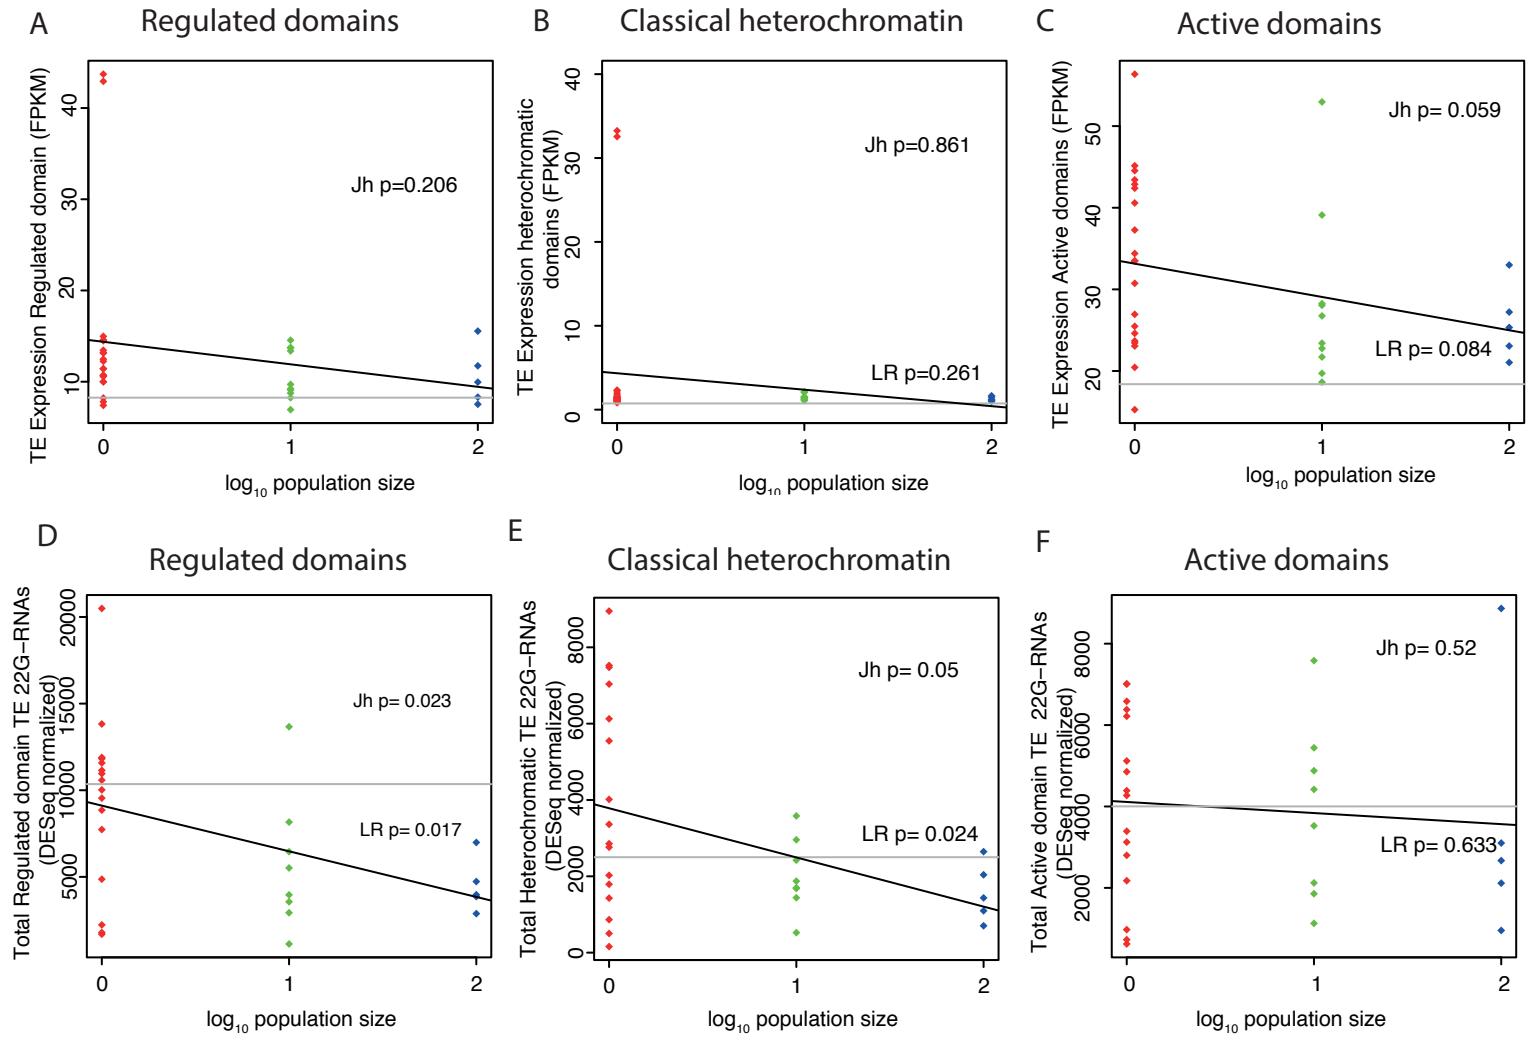

Figure 5

**A**

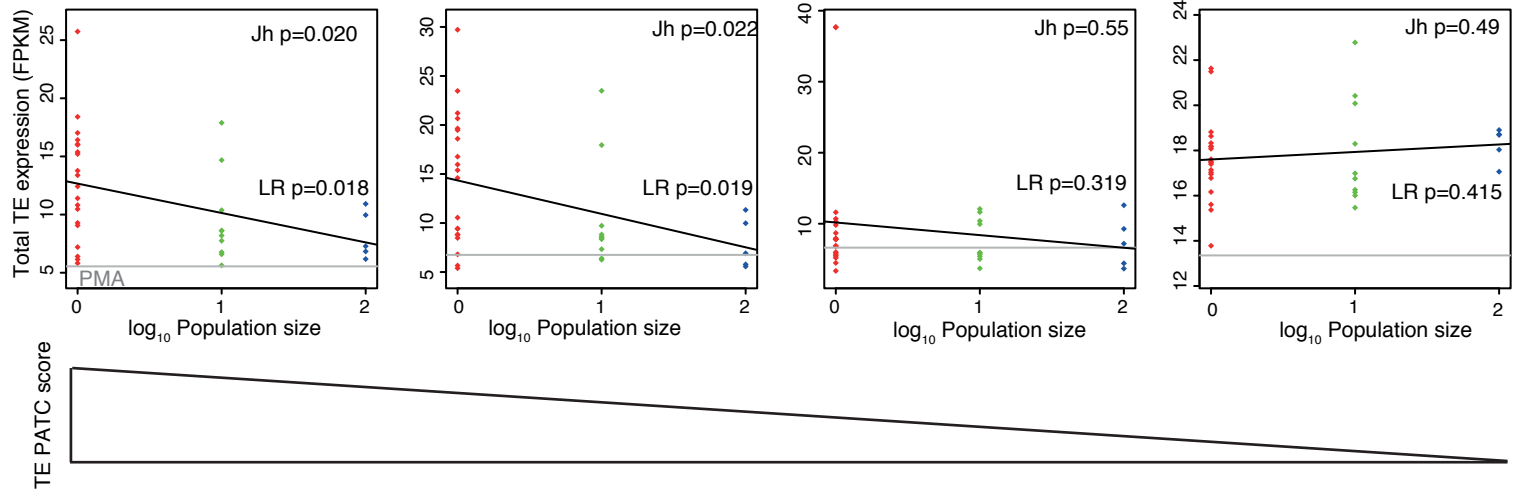

**B**

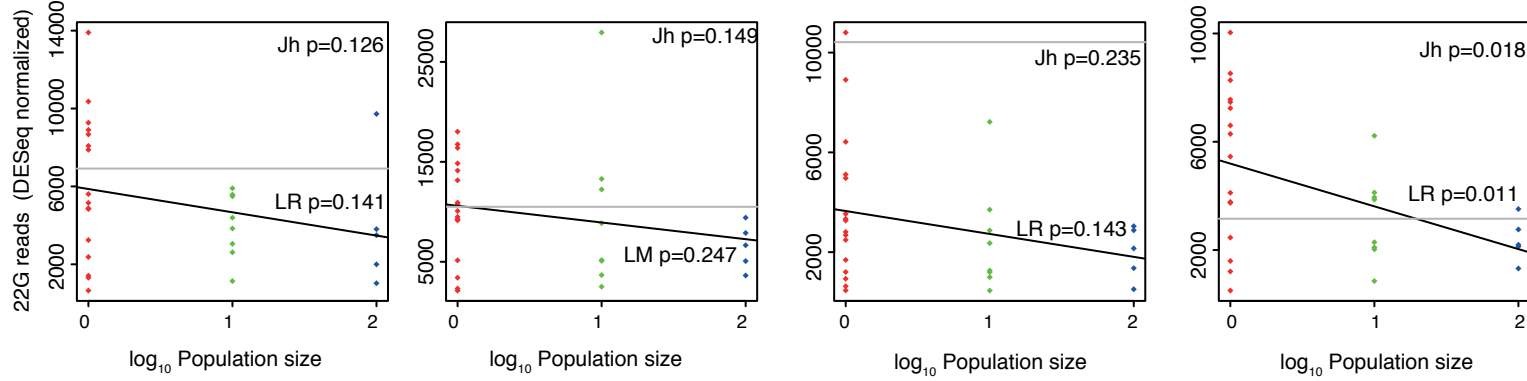

**C** Regulated chromatin

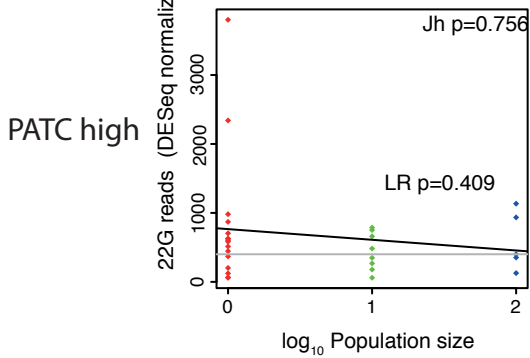

Classical heterochromatin

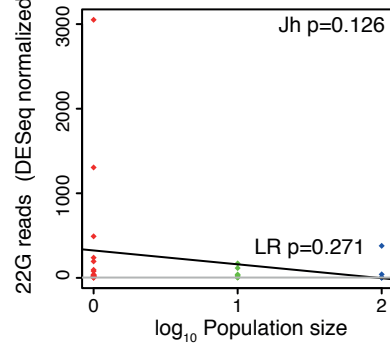

Active chromatin

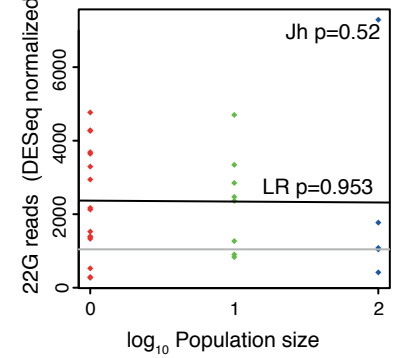

**D** Regulated chromatin

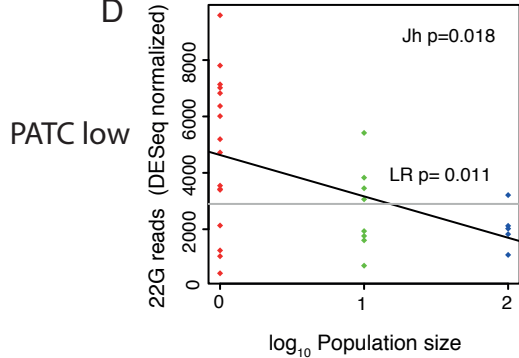

Classical heterochromatin

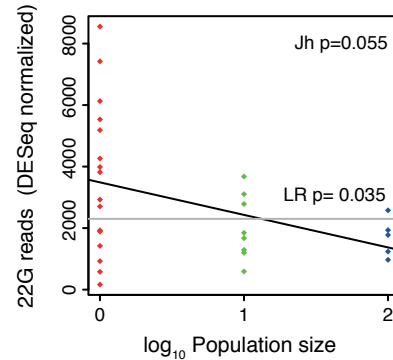

Active chromatin

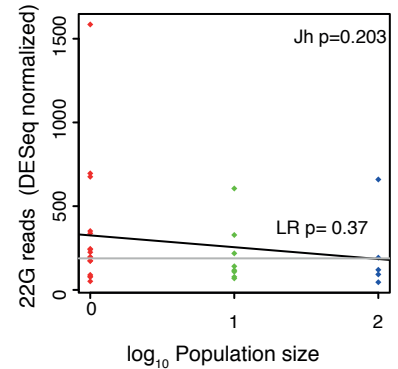

Figure 6

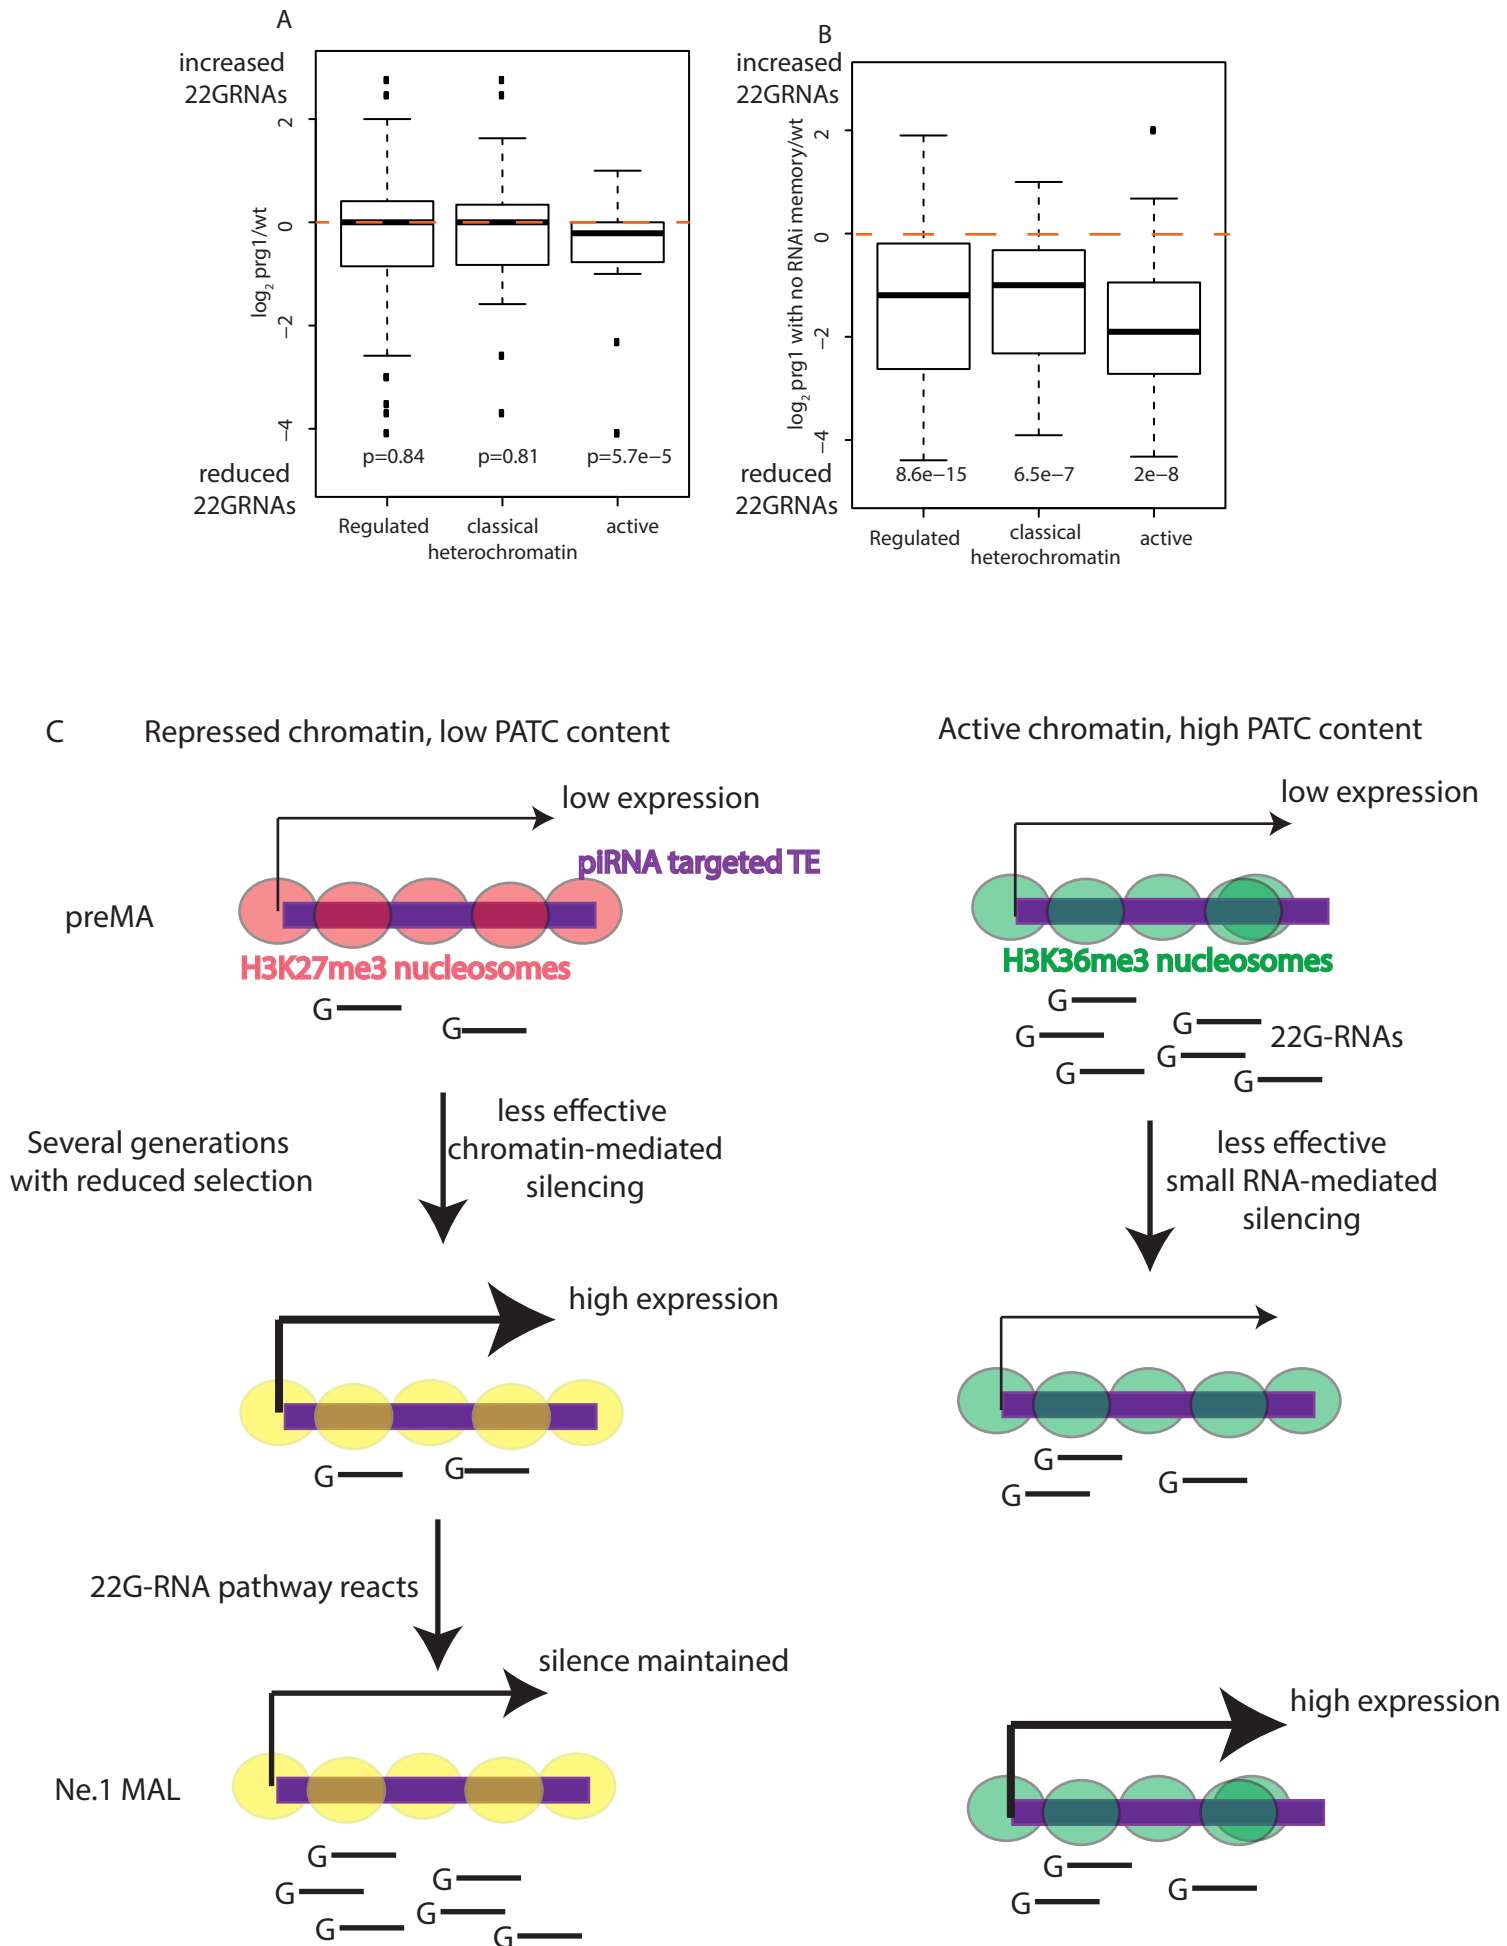

Figure 7



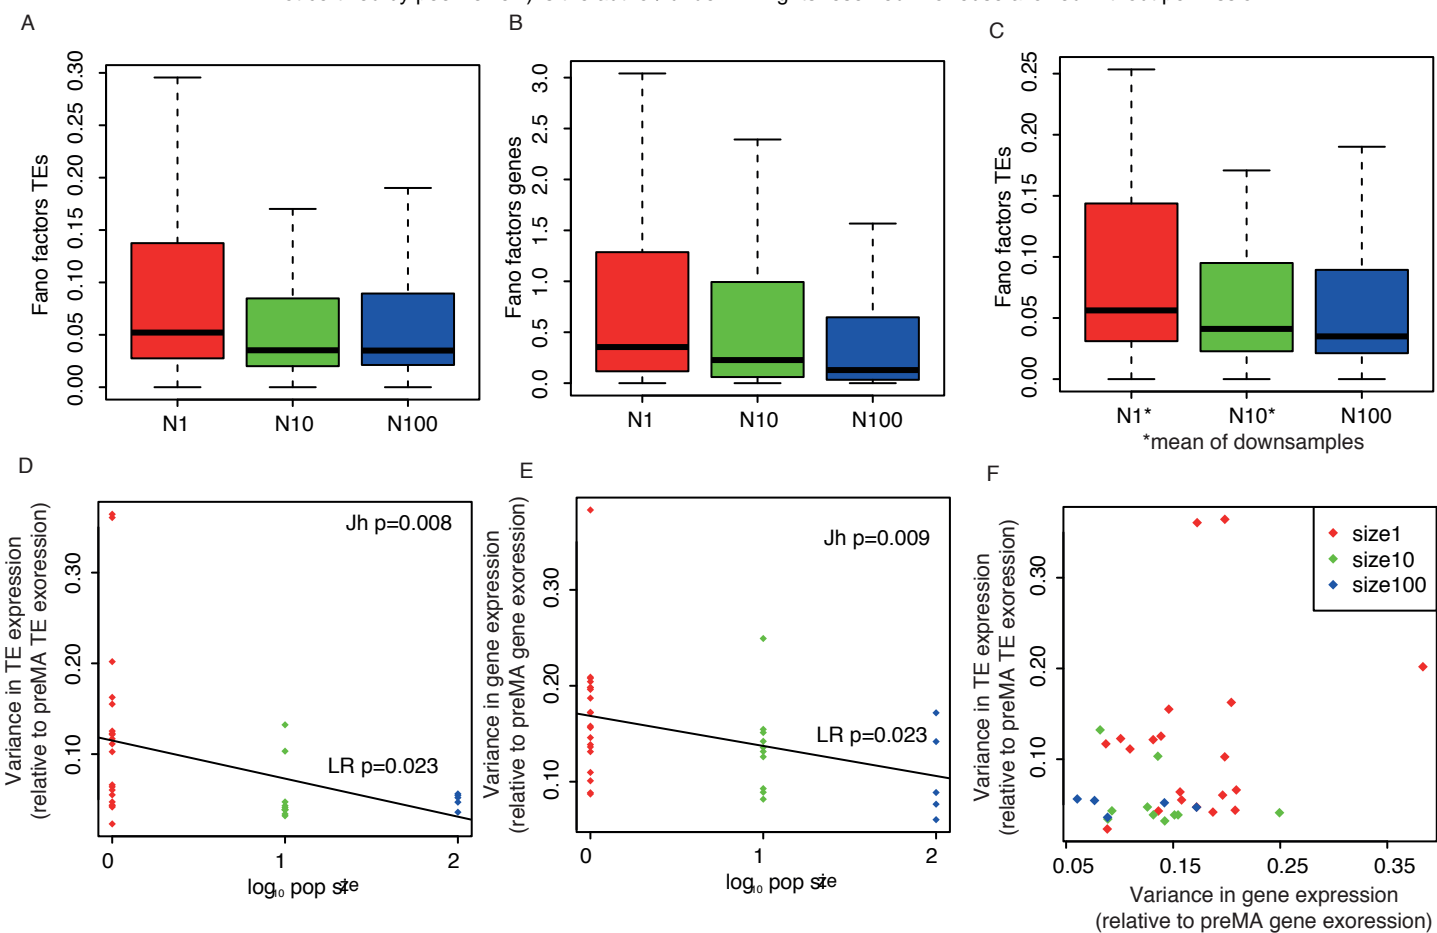

Supplemental Figure 1

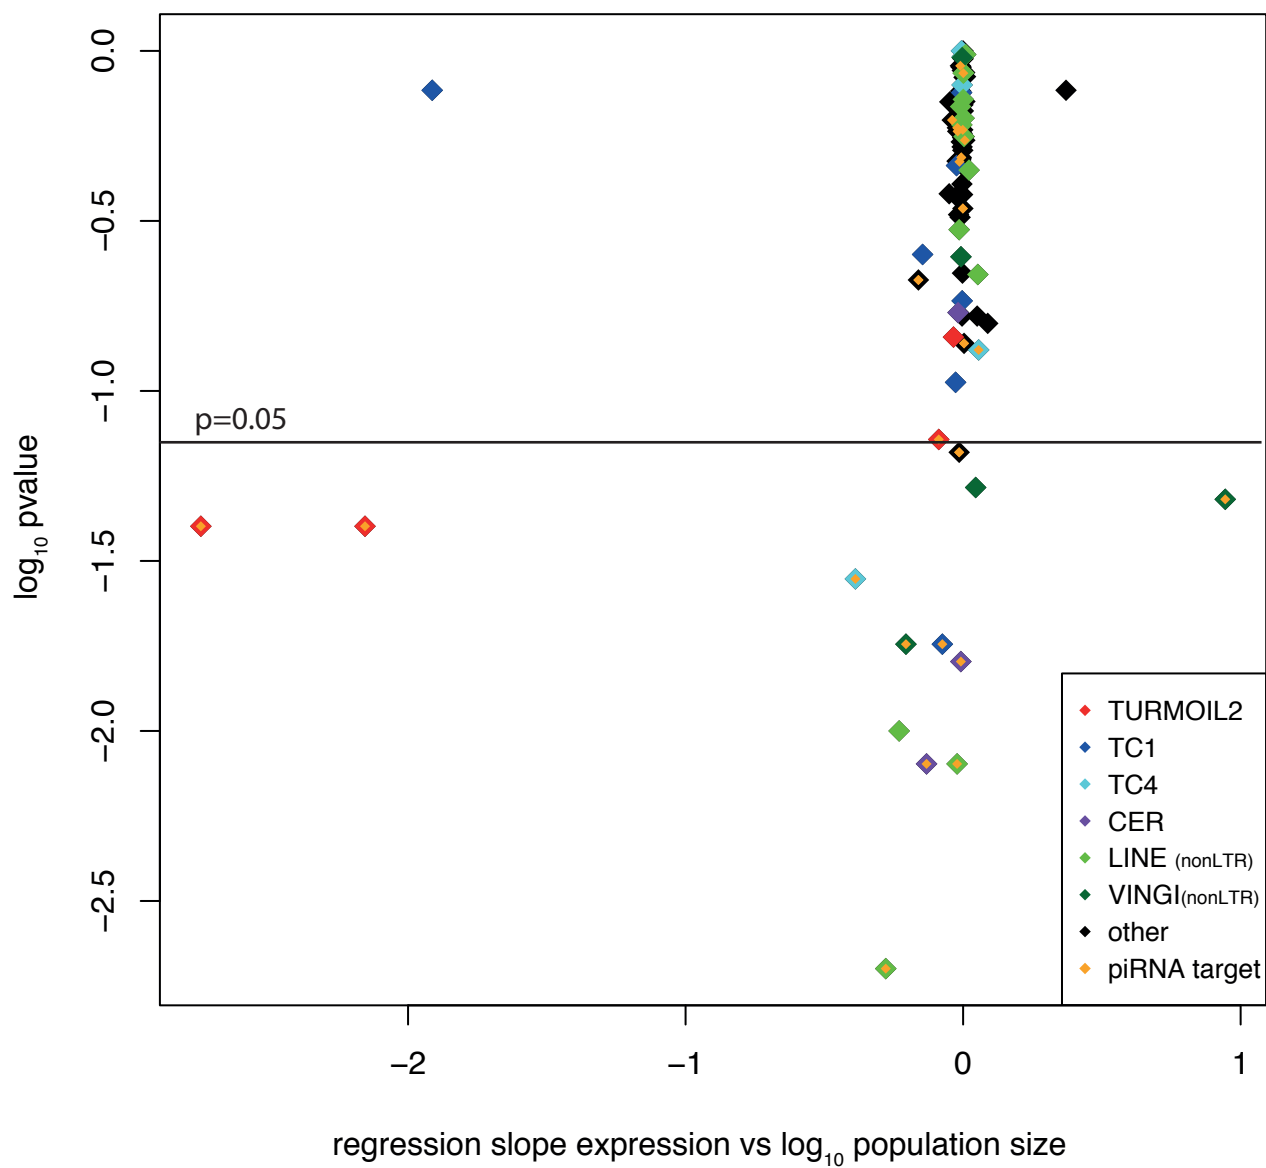

Supplemental Figure 2

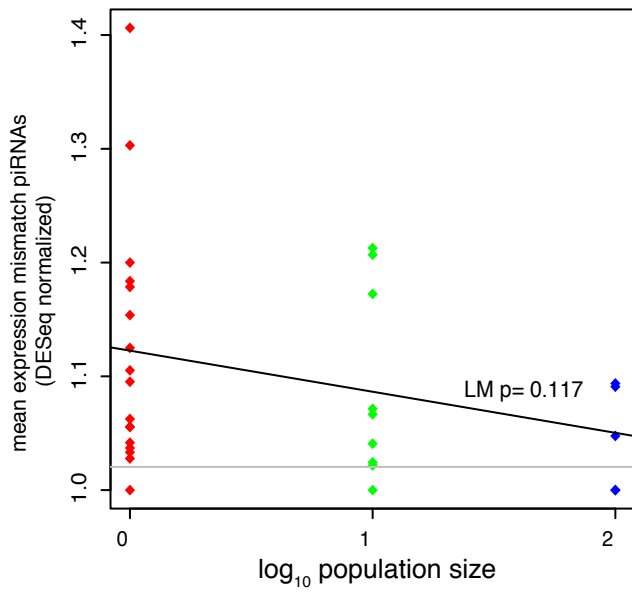

Supplemental Figure 3

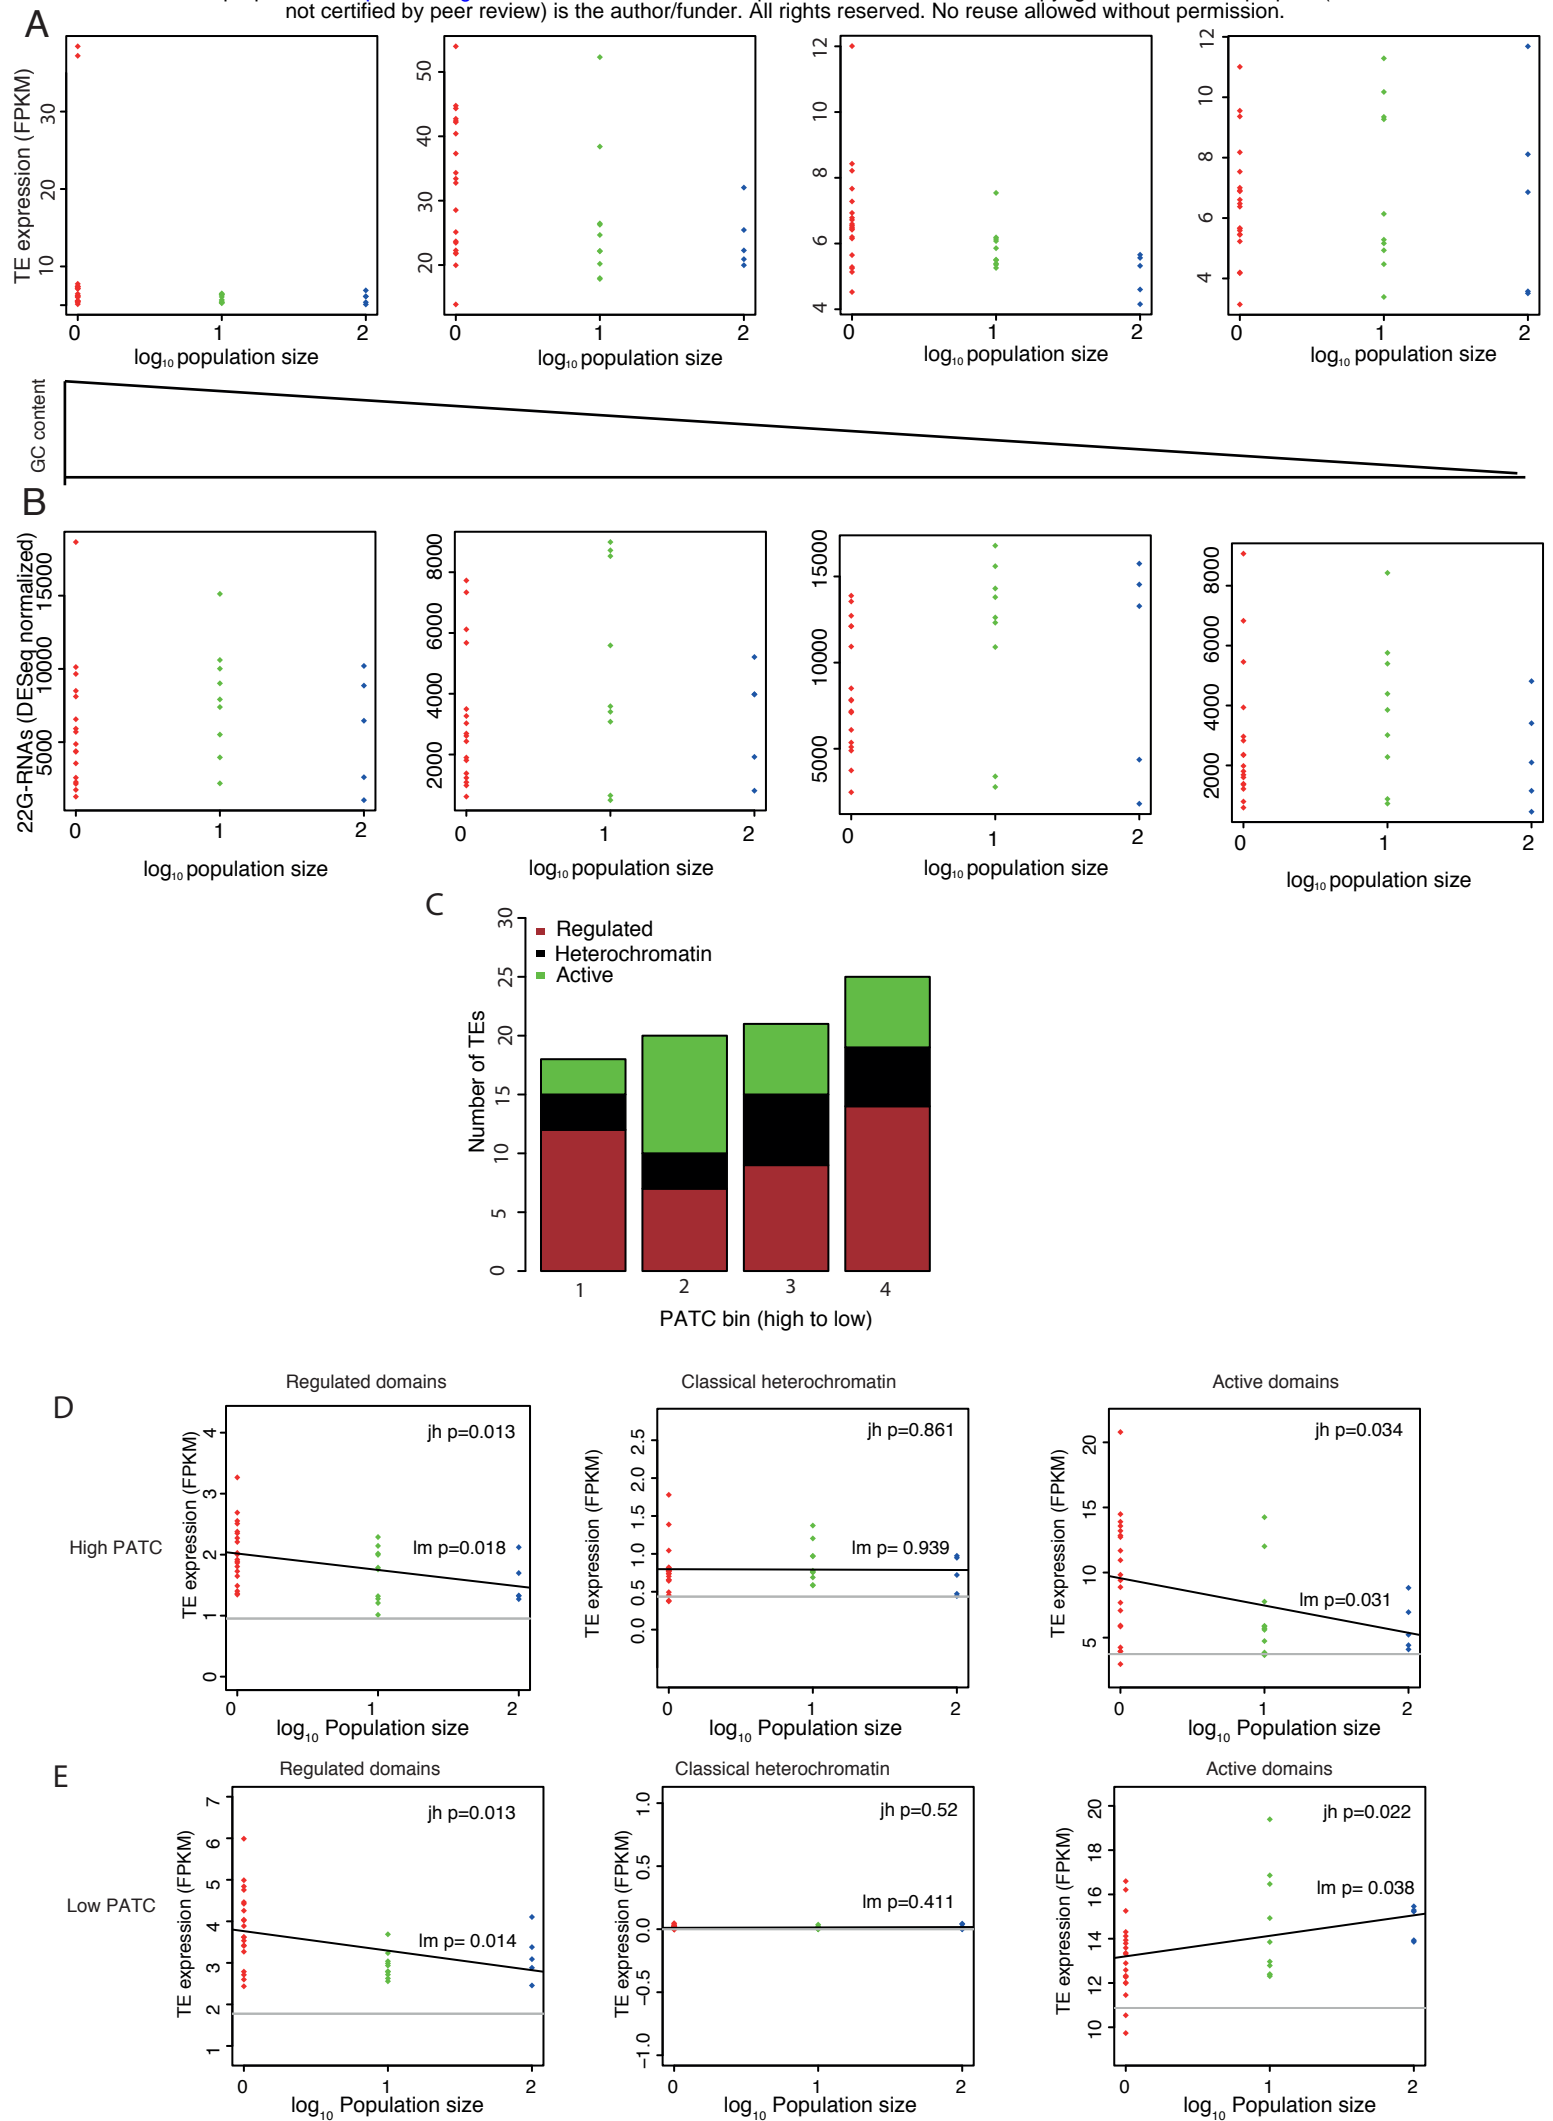

Figure S4
